1 **FPCountR: Absolute protein quantification using fluorescence measurements**

2

3 Eszter Csibra and Guy-Bart Stan

4

5 Department of Bioengineering, Imperial College Centre for Synthetic Biology (IC-CSynB),

6 Imperial College London, London, UK, SW7 2AY

7

8 **Correspondence:**

9 Eszter Csibra (e.csibra@imperial.ac.uk) and Guy-Bart Stan (g.stan@imperial.ac.uk)

10

11 **Keywords:** absolute quantification, calibration, engineering biology, fluorescent proteins,  
12 microplate reader, synthetic biology

13

14 **Abbreviations:** BCA, bicinchoninic acid; BSA, bovine serum albumin; EC, extinction  
15 coefficient; EDTA, ethylenediaminetetraacetic acid; FP, fluorescent protein, GFP, green  
16 fluorescent protein, MEFL, molecules of equivalent fluorescein, MEFP, molecules of  
17 equivalent fluorescent protein, OD, optical density; PEMS, particles of equivalent  
18 microspheres, SDS-PAGE, sodium dodecyl sulphate polyacrylamide gel electrophoresis;  
19 SEVA, Standardised European Vector Architecture

20

21

22 **Abstract**

23

24 This paper presents a generalisable method for the calibration of fluorescence readings on  
25 microplate readers, in order to convert arbitrary fluorescence units into absolute units.

26 FPCountR relies on the generation of bespoke fluorescent protein (FP) calibrants, assays to  
27 determine protein concentration and activity, and a corresponding analytical workflow. We  
28 systematically characterise the assay protocols for accuracy, sensitivity and simplicity, and  
29 describe a novel 'ECmax' assay that outperforms the others and even enables accurate  
30 calibration without requiring the purification of FPs. To obtain cellular protein

31 concentrations, we consider methods for the conversion of optical density to either cell  
32 counts or alternatively to cell volumes, as well as examining how cells can interfere with

33 protein counting via fluorescence quenching, which we quantify and correct for the first  
34 time. Calibration across different instruments, disparate filter sets and mismatched gains is

35 demonstrated to yield equivalent results. It also reveals that mCherry absorption at 600nm  
36 does not confound cell density measurements unless expressed to over 100,000 proteins

37 per cell. FPCountR is presented as pair of open access tools (protocol and R package) to

38 enable the community to use this method, and ultimately to facilitate the quantitative

39 characterisation of synthetic microbial circuits.

40

## 41 **Introduction**

42

43 There is a growing awareness that tackling the challenge of synthetic circuit design requires  
44 the synthesis of empirical characterisation data on genetic parts with mathematical  
45 modelling approaches for predicting and realising desired behaviours (1–3). However, there  
46 are numerous challenges in integrating experimental data with quantitative frameworks, as  
47 experimental data is typically acquired in relative or arbitrary units (specific to instruments  
48 and their respective settings), which cannot be converted into useful units and therefore  
49 limits our ability to make comparisons between experiments and models.

50

51 Fluorescent proteins (FPs) are our most versatile tools for the assessment of synthetic  
52 genetic element performance. Since their discovery, FPs have rightly been recognised as  
53 uniquely valuable reporter proteins for quantitative characterisation (4,5), since they do not  
54 require the addition of exogenous components to fluoresce. This makes their use easy and  
55 cost effective. Various laboratory instruments allow the characterisation of fluorescent  
56 systems in a wide range of dimensions and scales – through direct visualisation (using  
57 fluorescence microscopy), via single-cell fluorescence analysis (using flow cytometry), or via  
58 timecourse kinetic data acquisition (using microplate readers).

59

60 The ‘protein quantification problem’ of reporting GFP levels acquired by such instruments in  
61 ‘relative fluorescent units’ (RFU) has been widely recognised in synthetic biology (6). This  
62 recognition has led to the adoption of calibration standards such as fluorescein, a small  
63 molecular fluorophore with similar excitation and emission characteristics to GFP.

64 Fluorescein can be used to calibrate a given instrument by converting the instrument’s

65 arbitrary RFU output into units of ‘molecules of equivalent fluorescein’ (MEFL). This  
66 technique has been demonstrated to enable the comparison of GFP expression data  
67 gathered from different instruments as well as across laboratories (6,7).

68

69 While it is now approaching mainstream usage in synthetic biology, the conversion of green  
70 fluorescence values into MEFL is arguably not the most important type of quantification  
71 required for building synthetic circuits. Three aspects of the protein quantification problem  
72 remain elusive. First, fluorescein is only a good calibrant for green fluorescent proteins,  
73 leaving blue, yellow, orange and red FPs uncalibrated. Second, fluorescein can only provide  
74 a conversion to units of fluorescein, whereas what is actually needed is a conversion to units  
75 of protein. Currently, most experiments cannot even reveal the order of magnitude at which  
76 FPs are being expressed (ie. 10 vs 100,000 molecules per cell) – in contrast to what is  
77 possible with RNA sequencing (8). Third, while fluorescein can allow the comparison of GFP  
78 levels between instruments and laboratories, it cannot address the comparison between  
79 two different FPs in the same circuit. This is only possible if RFUs from both FPs can be  
80 separately converted into molecular units of protein. Some have attempted to tackle this by  
81 attempting to predict the relative brightness of FPs using theoretical values (9,10), but such  
82 calibrations make a number of assumptions, for instance about translation rate equivalence  
83 across constructs, that require validation before they can be adopted.

84

85 Fortunately, there is a reasonably simple solution. The ideal calibrant in molecular biology is  
86 considered to be a purified sample of the molecule to be measured – in this case, the  
87 fluorescent protein itself. While purified FPs are not generally commercially available, they  
88 can be produced ‘in-house’, thereby providing that crucial direct link between relative

89 fluorescence units and molecules of protein. Indeed, FP calibration has been proposed in  
90 the past, though its use has been limited to microscopy (11–13) and remains rare for  
91 microplate assays (14,15). We suspect this is due to (a) an underappreciation that absolute  
92 quantification is possible without ‘omics’, (b) a reticence to try unfamiliar biochemical  
93 protocols that are not usually part of the synthetic biology or microbiology repertoire, and  
94 (c) doubt that such protocols could be accurate or sensitive enough for general usage. These  
95 motivated us to develop a general, yet simple-to-use calibration protocol of this nature.

96

97 In what follows, we outline our optimised calibration method and present it as a pair of  
98 resources: a wet lab protocol, called FPCount (available on [protocols.io](#)) and an  
99 accompanying analysis package, called FPCountR (available on [GitHub](#)). We present data  
100 showing the development of this protocol, and systematically characterise the biochemical  
101 and analytical requirements of an accurate and sensitive calibration. We also present a  
102 novel fluorescent protein assay, which acts both to simplify the method to remove the  
103 requirement for protein purification, and to make it more sensitive and robust. Using  
104 FPCountR, we show that conversion to molecular units can be used to calibrate across  
105 different instruments, disparate filter sets and mismatched gains to yield equivalent results.  
106 We demonstrate that conversion to absolute units allows the user of our method to  
107 compare the protein production efficiency of different fluorescent proteins expressed from  
108 an otherwise identical vector in molecules per cell, or as a molar concentration. Finally, we  
109 demonstrate that this method can be used to quantitatively evaluate the experimental  
110 protocols themselves, such as the extent to which red fluorescent proteins confound optical  
111 density readings in timecourse assays.

112

## 113 **Results**

114

115 Our aim for this work was to develop a generalisable method for FP calibration that could be  
116 used by any group wishing to calibrate fluorescence readings on microplate readers to  
117 molecular units. To do this, we defined a number of key aims for our proposed method.  
118 First, it should be accurate and sensitive, as we need the method to correctly estimate  
119 molecule numbers within cells, and as protein yields from small-scale purifications are  
120 typically modest. Second, the calibration protocol should be as simple as possible and  
121 adapted ideally such that each respective assay may be carried out in 96-microwell plate  
122 format using the same plate reader that is being calibrated. This way, multiple fluorescent  
123 proteins may be calibrated at once, and end users do not require any additional  
124 instrumentation. Third, the method should be suitable for the particular characteristics of  
125 fluorescent proteins. These proteins are smaller and structurally distinct from typical  
126 protein calibrants such as bovine serum albumin (BSA), and are known to present certain  
127 challenges for quantification due to light absorption by their chromophores. Thus, any assay  
128 developed for non-fluorescent proteins requires a separate validation on FPs to  
129 demonstrate that they are also adequate for this class of proteins. Finally, we wanted to  
130 enable the easy analysis of the data, by (i) enabling easy conversion of raw calibration data  
131 into a conversion factor that links the arbitrary fluorescence output of a protein with its  
132 quantity in molecular units, and (ii) allowing easy conversion of data from all future  
133 timecourse data from that instrument to produce outputs in (e.g. GFP) molecules, rather  
134 than relative (e.g. green) fluorescence units. An overview of the FPCount fluorescent protein  
135 calibration protocol is illustrated in Fig. 1.

136

## 137 **Design of purification protocol for obtaining protein calibrants**

138 In order to obtain our fluorescent protein calibrants, they must first be produced by  
139 overexpression, and purified. Protein purification methodologies can often be highly  
140 complex, requiring specialist expertise and instrumentation. To alleviate this, our protocol  
141 was explicitly designed to be as straightforward as possible, involving only the minimum  
142 number of required steps, and using commonly available reagents. It was also designed to  
143 be amenable to small-volume purifications to enable the calibration of multiple proteins in  
144 parallel. The protocol is summarised in Fig. 2A. A standardised FP expression vector was  
145 constructed from an arabinose-inducible His-tagged FP construct in a high-copy SEVA vector  
146 (Fig. 2B). The use of high-copy vectors and overnight expression was designed to maximise  
147 protein production, and the temperature was dropped to 30 °C to minimise misfolding. Cells  
148 were lysed using sonication to avoid the requirement to add chemical components that may  
149 interfere with downstream processes, such as EDTA (with His-tag purification), detergents  
150 (with protein quantification), or unknown components of commercial lysis reagents.  
151 Insoluble proteins were removed via centrifugation and SDS-PAGE was used to confirm that  
152 the majority of the expressed FP was in the soluble fraction (Fig. 2C). Proteins were purified  
153 using His-tag affinity purification, as His tags are small in size, making them unlikely to  
154 compromise fusion protein function. Cobalt resin was used as the affinity matrix as it has  
155 higher specificity for His tags than nickel resin, and was therefore expected to co-isolate  
156 fewer impurities. The quality of purified FP calibrants was verified by SDS-PAGE and  
157 fluorescence excitation and emission scanning (Fig. 2D-E, Supplementary Fig. 1). Purified  
158 calibrants were of consistently good purity and yield.

159

160

## 161 **Conducting a plate reader calibration**

162 The calibration of plate readers with fluorescein has traditionally been conducted using a  
163 dilution series of known concentrations of fluorescein, subjected to a fluorescence assay in  
164 the plate reader whose calibration is desired (measurement of relative fluorescence units,  
165 RFU). The results are used to relate fluorescein molecule number to RFU to obtain a  
166 conversion factor, which can in turn be used to convert RFU readouts from experimental  
167 data into MEFL units (6). For protein calibrants, one additional step is required: protein  
168 concentration determination.

169

170 In our initial protocols, we opted for the bicinchoninic acid (BCA) assay due to its sensitivity,  
171 ease of use and low protein-to-protein variability (16). In addition, microplate-optimised  
172 reagents for a 'microBCA' were available from ThermoFisher, with excellent reported  
173 sensitivities (to 2 ng/ $\mu$ l). Pilot tests showed an inhibitory effect of the Tris and NaCl in the  
174 elution buffer (Supplementary Fig. 2A) suggesting that buffer exchange would be necessary  
175 for high assay sensitivity. Normalised measurements using a BSA standard obtained with the  
176 kit were fitted to a polynomial equation to obtain a standard curve (Supplementary Fig. 2D,  
177 ii). This was then used to predict the concentrations of FPs prepared as serial dilutions by  
178 first removing values under the reported threshold of sensitivity and fitting a linear model  
179 through the rest of the values (Supplementary Fig. 2D, ii and iii). An extra step was added to  
180 the recommended protocol (Supplementary Fig. 2A, ii and Supplementary Fig. 2C) to  
181 account for baseline absorbance of red FPs in the A562 range. These calculations are  
182 handled in the FPCountR package by the `get_conc_bca()` function. Using the resultant  
183 predicted protein concentrations and fluorescence assay data on the same FP dilution  
184 series, an adapted version of the `generate_cfs()` function from flopR (7) was used to



185 generate conversion factors (RFU/molecule) for mCherry in a Tecan Spark plate reader for  
186 the red FP-typical filter set (ex 560/20, em 620/20; Supplementary Fig. 3).

187

### 188 **Development of a second assay for FP concentration – the A280 assay**

189 We sought to verify the accuracy of the BCA assay by re-quantifying our FPs with a second  
190 method that is likely to give reliable concentration estimates. While a wide variety of  
191 protein assays exist, the only widely-used ‘absolute’ assay that does not require a calibrant  
192 is the A280 assay. As the name suggests, it quantifies protein concentration via light  
193 absorbance at 280 nm, where three amino acid residues are known to absorb light in a way  
194 that has been shown to be approximately additive (17). This means that a reasonable  
195 prediction of light absorbance at 280 nm can be made for any pure protein of known  
196 primary sequence by way of an extinction coefficient (EC; expected light absorption for a  
197 given concentration of protein). As sample absorbance relates to molecular concentration  
198 according to Beer’s law, i.e.,  $A = EC * C * L$ , (where  $A$  is the absorbance,  $EC$  is the  
199 extinction coefficient ( $M^{-1}cm^{-1}$ ),  $C$  is the concentration (M), and  $L$  is the path length (cm)),  
200 the protein concentration may be calculated from absorbance using only the extinction  
201 coefficient and the path length. The most common formats for A280 measurements are  
202 laborious, single-throughput cuvette- or Nanodrop-type measurements, requiring the  
203 adaptation of the standard A280 protocols for use in 96-well microplates. We have  
204 summarised the requirements for such an adaptation in Supplementary Note 1 and  
205 Supplementary Fig. 4-8. In brief, the best results for A280 assays were obtained by using UV-  
206 clear plastic, removing additives, correcting for path length variation, and correcting for light  
207 scatter. This required the collection of an absorbance spectrum from 200-1000 nm rather

208 than just one reading at 280 nm, and is processed by two consecutive FPCountR functions,  
209 `plot_absorbance_spectrum()` and `get_conc_a280()` (Supplementary Fig. 6-7).

210

### 211 **Systematic testing of the calibration protocol allows method validation**

212 We sought to conduct a systematic assessment of the BCA and A280 methods by testing  
213 three spectrally distinct FPs in two buffers, assessed with both assays in parallel (Fig. 3). The  
214 chosen FPs (mTagBFP2, mGFPmut3 and mCherry) are widely used, monomeric, reasonably  
215 fast-maturing and bright. All three are almost identical on the protein level to their FPbase  
216 entries (Fig. 2B; Materials & Methods; Supplementary Data), with the exception that they all  
217 have a His<sub>6</sub> tag N-terminal extension, and mGFPmut3 includes a well-defined monomeric  
218 A206K mutation (18,19). The chosen buffers (T5N15 (5mM Tris-HCl pH 7.5, 15 mM NaCl)  
219 and T5N15 with protease inhibitors) were both compatible with the microBCA assay  
220 (Supplementary Fig. 2B), however, pilot studies suggested they might have different effects  
221 on the A280 assay. Following purification, FPs were initially dialysed to remove additives,  
222 then re-dialysed into the respective assay buffer (Fig. 3A). Each FP:buffer combination was  
223 then serially diluted, and subjected to an absorbance scan (200-1000 nm measurement, for  
224 the A280), a fluorescence assay (fluorescence measurement with appropriate filters for  
225 each FP) and a microBCA assay (reagent addition, incubation and A562 measurement). The  
226 results of this comparative test are shown in Fig. 3B-C, Supplementary Fig. 9 and  
227 Supplementary Tables 1-3. Broadly, the results from each assay validate those of the other  
228 assay: the measured concentration of each FP using the microBCA and A280 assays are  
229 within 2-fold of each other for most samples (Fig. 3C) and apparent linear ranges reach 1  
230 ng/ $\mu$ l for most dilution series (Fig. 3B). For comparison, the reported sensitivity on the  
231 Nanodrop is 100 ng/ $\mu$ l (20). We observed some buffer sensitivity for both assays – the

232 microBCA produces more linear results in the buffer containing protease inhibitors, whereas  
233 the A280 does better in the buffer without them. Overall, the A280 assay produces data  
234 that fits better to a linear regression than the microBCA assay, suggesting it may be more  
235 reliable at the relatively low concentrations used in these assays (Supplementary Table 2).  
236 Buffer effects were also apparent for the fluorescence assay (Supplementary Note 2,  
237 Supplementary Fig. 10). Conversion factors obtained from different purification batches  
238 gave similar estimates where concentration estimates were made using optimal  
239 assay:buffer pairings (Supplementary Fig. 9B).

240

#### 241 **FPbase-enabled ECmax method performs better than conventional assays**

242 We trialled a third protein assay during this experiment, designated here as the ‘ECmax’  
243 method. The principal idea behind this assay is that the A280 extinction coefficient is not  
244 the only known extinction coefficient for FPs. FPs also possess an extinction coefficient (‘EC’)  
245 corresponding to their light absorption at their peak (‘max’) excitation wavelength. As the  
246 ‘ECmax’ of most FPs is available on FPbase, we can automate its retrieval using the FPbase  
247 API (21). (FPbase ([www.fpbases.org/](http://www.fpbases.org/)) is an open-source, community-editable database of  
248 fluorescent proteins and their properties. Each FP in the database contains its own page  
249 with a structured set of properties, such as its primary protein sequence, extinction  
250 coefficient and fluorescence spectra. Essentially all commonly used FPs have entries on this  
251 database, along with rarely used variants, and these are accessible via its API.) The analytical  
252 processing steps for the ECmax assay (in `get_conc_ecmax()`) are similar to those of the A280  
253 assay (Supplementary Fig. 8), and require no further readings. As the maximal absorbance  
254 peaks for all FPs tested were higher than those at 280 nm (Supplementary Fig. 1B,  
255 Supplementary Table 4), we anticipated that the ECmax assay would be more sensitive.

256 Further, as protease inhibitors absorb at wavelengths under 300 nm, we hypothesised this  
257 assay may be less buffer-sensitive. Compellingly, both appear to be true: we consistently  
258 found that the ECmax assay produced larger linear ranges and lower limits of detection than  
259 the other assays (approaching 0.1 ng/ $\mu$ l, 10-fold better than the A280 assay and 1000-fold  
260 better than a Nanodrop), and that it produced almost indistinguishable results whether or  
261 not the buffer contained protease inhibitors (Fig. 3B-C, Supplementary Fig. 9,  
262 Supplementary Table 1). In addition, predictions from the ECmax assay closely match those  
263 from the A280, typically predicting concentrations matching at 80-100 % those of the  
264 expected result (rather than 170-220% for microBCA; Fig. 3C, Supplementary Table 1),  
265 suggesting an error rate of <20% compared to the reference value from the A280 assay. For  
266 these reasons, we propose that the ECmax assay would be the most robust assay to include  
267 in a simple calibration protocol and will proceed using concentrations calculated from  
268 ECmax assays in what follows.

269

### 270 **Robustness of calibration protocols using purified FPs**

271 To further investigate the reproducibility of this calibration method, we completed two  
272 more independent repeats of calibrations with all three FPs using the T5N15pi buffer and  
273 the ECmax assay. From this data, we observed that one of our calibration runs obtained  
274 with mTagBFP2 in our original experiments (Supplementary Fig. 9A, mTagBFP2 set1)  
275 produced an anomalous value for the mTagBFP2 conversion factor, which was 1.67-fold  
276 higher than the other replicates. As a result, we present a comparison of the reproducibility  
277 of conversion factors as compared with conversion factors from set 2 of the original data  
278 (Supplementary Fig. 9C). The full data is provided in Supplementary Table 5. Our data  
279 suggests that, generally, the conversion factor values obtained using the described method

280 are highly reproducible (they differ by less than 20% in all cases except for the anomalous  
281 mTagBFP2 value, with resultant coefficients of variation between 0.06-0.09). Therefore, we  
282 recommend users conduct two independent calibrations for each FP, and exercise caution if  
283 the replicates differ by over 20%.

284

### 285 **ECmax assay enables FP calibration without protein purification**

286 Having established that the ECmax assay, a protein quantification assay that relies only on  
287 the peak light absorbance of each FP, is highly accurate and sensitive for purified proteins  
288 measured using trusted methods, we asked whether this method could enable us to drop  
289 the purification step altogether. Dropping the purification step was not possible for the  
290 other assays as they are designed to quantify total protein concentrations, but the ECmax  
291 should in principle be specific for the considered FP and may therefore be used to quantify  
292 FPs in crude lysates. To investigate this, we harvested and lysed cells expressing our three  
293 FPs, separated the soluble fractions and concentrated them. Putting these through an  
294 ECmax assay and fluorescence assay, we observed it was possible to quantify FPs in crude  
295 lysates with high sensitivity (to 1 ng/ $\mu$ l; Supplementary Fig. 11A), and to obtain almost  
296 identical conversion factor values as from our purified FPs, using the mean conversion factor  
297 from all (non-anomalous) purifications used as a comparator (Fig. 3E-F, Supplementary Fig.  
298 11B, Supplementary Table 5). Of the two lysis methods tested – sonication and chemical  
299 lysis – the former produced more accurate results (conversion factors were closer to the  
300 expected conversion factor from purified proteins – 90-99% of expected values) and they  
301 also had high precision (low variability, with coefficients of variation between 0.02-0.12,  
302 similar to the CVs observed with purified calibrants). Repeated testing of calibrants  
303 prepared by sonication suggests that FPs maintain stability in lysates when stored at 4 °C for

304 a number of weeks (Supplementary Fig. 11C). Using the ECmax assay for FP quantification, it  
305 is thus possible to remove the purification step altogether without compromising calibration  
306 accuracy and precision.

307

### 308 **FPCountR produces comparable conversion factors to commercially available calibrants**

309 We were interested in testing whether our purified FPs gave similar RFU to molecule  
310 conversion factors as commercially available FPs. Very few FPs are available commercially,  
311 and the majority are green FPs, so we focussed on those. We compiled a table of available  
312 GFPs to ascertain the best candidates to order (Supplementary Table 6). Surprisingly, many  
313 were based on first generation GFPs that preferentially excite in the UV range (unlike  
314 GFPmut3 or sfGFP), had incomplete datasheets lacking protein sequence, brightness or  
315 spectral information, or were not subject to explicit quality controls (Supplementary Note  
316 3). This suggested their production may be less rigorous than the methods described in this  
317 paper and makes them difficult to recommend as calibrants (Supplementary Note 3).

318 Nonetheless, using a commercial TurboGFP, we obtained a relative conversion factor of  
319 95.0% compared to the value obtained using our purified mGFPmut3 (Supplementary Table  
320 5), which suggests that FPs from in-house and (carefully selected) commercial sources may  
321 be used interchangeably. Further, calibrations using the small molecule fluorescein  
322 produced conversion factors with only 33% error compared to mGFPmut3, provided that  
323 the spectral differences between mGFPmut3 and fluorescein were accounted for  
324 (Supplementary Fig. 12, Supplementary Table 5), showing decent comparability between a  
325 protein and small molecule calibrant. To our knowledge, this is also the first experimental  
326 validation that fluorescein may under certain conditions allow the conversion of RFU not  
327 just to molecules of fluorescein but also to approximate molecules of protein.

328

329 **Calibration allows comparison across instruments for FPs other than GFP**

330 While fluorescein enables the comparison of experimental results across laboratories and  
331 instruments by converting arbitrary units into ‘molecules of equivalent fluorescein’ (MEFL)  
332 units, FP calibration in principle offers the same capability by converting arbitrary units into  
333 units of ‘molecules of equivalent FP’ (MEFP), which is carried out using FPCountR’s  
334 `process_plate()` function (Fig. 4A-B). This allows us to quantify the number of FP molecules  
335 in each well of our microplates. To calculate uncalibrated ‘per cell’ values, typical studies  
336 will divide the RFU values by the optical density (OD600 or OD700) of the culture, which  
337 quantifies cell density. The calibration of optical density to particle number can be achieved  
338 through a similar calibration process using microspheres of similar size to *E. coli* (22,23).  
339 Using both calibrations, it is possible to quantify molecule number per cell in ‘molecules of  
340 equivalent FP per particles of equivalent microspheres’ (MEFP/PEMS, Fig. 4C), units which  
341 should allow cross comparison between different instruments, gains and filter sets. To test  
342 this, overnight cultures of *E. coli* containing mCherry expression vectors were split into  
343 separate but identical microplates containing arabinose, and were grown in two plate  
344 readers using a range of settings. The results show that normalised values of relative  
345 fluorescence differ by ~1.5, ~3 and ~130-fold without calibration, whereas such values  
346 become reliably comparable after calibration, even for experiments conducted using  
347 instrument settings that produce values that cannot be legibly plotted on the same axis (Fig.  
348 4D).

349

350 **Calibration allows estimation of absolute cellular protein concentration**

351 We next asked if calibration to units of MEFP/PEMS was a reasonable approximation for  
352 molecule number per cell (Fig. 5A). We carried out microsphere calibration using 1 cm  
353 cuvettes and a standard spectrophotometer and obtained conversion factors  
354 (Supplementary Table 7) that fell within the range quantified by empirical OD600-specific  
355 cell counts (24). In addition, other authors have confirmed that values of fluorescent protein  
356 per cell using fluorescein and microsphere calibrants (MEFL/PEMS) are approximately equal  
357 to those obtained using fluorescein-calibrated single cell data on a flow cytometer (7,23),  
358 suggesting particle counts were likely to approximate actual cell numbers. However, we  
359 observed a major caveat to the use of microspheres as calibrants, which is that their  
360 absorbance profiles differ from that of cells. This can frustrate their ability to provide  
361 accurate conversions between ‘per cell’ data calculated using OD700 versus OD600  
362 measurements (Supplementary Fig. 13 and Supplementary Tables 4-5) for which we discuss  
363 solutions in Supplementary Note 4.

364

365 The question of whether the measured fluorescence of FPs in cells is the equivalent of  
366 measured fluorescence of the same number of FPs *in vitro* is less clear. Some authors have  
367 found that cells attenuate (or ‘quench’) fluorescence (15,25), but the magnitude of the  
368 effect has not been systematically investigated, particularly for modest cell concentrations  
369 found in a typical *E. coli* growth assay. We quantified the quenching properties of *E. coli* cells  
370 on our three FPs by mixing an increasing concentration of non-fluorescent cells with purified  
371 FPs, and quantifying the difference in apparent fluorescence with added cells (Fig. 5B and  
372 Supplementary Fig. 14). Our results suggest that this ‘quenching’ effect amounts to less than  
373 20 % of the fluorescence signal for moderate cell densities (OD600/cm under 0.5), but  
374 increases to about 30 % for the highest cell densities typically observed in microplate-scale



375 cultures (OD600/cm around 2). This information was used to add a correction step into the  
376 process\_plate() calculations so as to compensate for the expected percentage loss of  
377 fluorescence with increasing cell density (Fig. 5B, right panel). The complete analytical  
378 workflow from calibration to experimental data processing is illustrated in Supplementary  
379 Fig. 15.

380

381 Using these amendments, it is possible to convert response curve assay data into molecules  
382 per cell. Figure 5C shows one experiment using mCherry expression construct in two vectors  
383 with different origins of replication. Using these vectors, we obtain figures for mCherry  
384 abundance that vary between about 900 to 70,000 molecules per cell for p15A, and 200 to  
385 200,000 for colE1. Protein abundance information, available from proteomics and ribosome  
386 profiling studies, suggests that the typical *E. coli* protein is present in the order of  $10^2$ - $10^3$   
387 copies per cell, and the most abundant are present in the order of  $10^5$  copies per cell or  
388 higher (26–28). Over-induction using the high-copy (colE1) vector therefore appears to  
389 allow synthetic protein expression to reach the level of the most abundant proteins in the  
390 cell. This is supported by the fact that these vectors reliably overexpress FPs to a level  
391 observable by SDS-PAGE in unpurified lysates (Fig. 1, Supplementary Fig. 1). Modest  
392 expression ( $10^2$ - $10^3$  per cell) can be achieved by combining low arabinose concentrations  
393 with either vector. In other words, the colE1 vector allows us to utilise the full spectrum of  
394 protein abundances from modestly expressed enzymes such as the RecBCD helicase (~100  
395 copies per cell) through to the most abundant ribosomal proteins (~100,000 copies per cell,  
396 (28)). We could also use this to compare the number of molecules produced from the same  
397 vectors but two different FPs. Interestingly, measurements from identical SEVA vectors  
398 revealed that while the FP abundances were in the same order of magnitude, mTagBFP2

399 accumulated to higher levels per cell than mCherry by 3.8-fold on average, despite sharing  
400 the same promoter, 5' untranslated region, ribosome binding site and N-terminal protein  
401 sequences (Fig. 5C-D). This could be due to translation rate effects from RNA level effects in  
402 the coding sequences beyond the first 11 standardised codons, or else due to differences in  
403 degradation kinetics between the two proteins.

404

405 In 2011, Volkmer and colleagues noted that while OD-specific *E. coli* cell counts varied with  
406 growth rate, the OD-specific total cell volume was approximately 3.6  $\mu\text{l}$  per OD600/cm,  
407 regardless of strain or growth condition (24). Using OD as a measure of the cumulative  
408 cellular volume in a culture could therefore be used to convert fluorescence and OD  
409 measurements into concentrations in molar units, instead of 'per cell' values, and such  
410 conversions may be more appropriate for comparing experimental results with quantitative  
411 modelling of cellular reaction networks, since they are unaffected by growth rate  
412 differences. Using this method, we found that FP abundances using the same vectors  
413 populate a range of concentrations between 0.01-100  $\mu\text{M}$  (Fig. 5D).

414

#### 415 **Absolute quantification reveals hidden properties of fluorescent proteins**

416 Finally, we were interested in testing whether absolute quantification could illuminate a  
417 well-known source of error in bacterial assays. The presence of red FPs has been suggested  
418 to interfere with bacterial cell density estimations at 600 nm since red FPs typically absorb  
419 well at this wavelength (29) and has led to the conclusion that circuits using red FPs must be  
420 quantified at 700 nm, which is unaffected by their presence. However, the number of  
421 molecules of red FPs that might be required for this effect to occur has never been  
422 quantified.

423

424 Calibrated timecourse data of mCherry overexpression in *E. coli* (Fig. 6) was examined to  
425 quantify these effects, with mGFPmut3 and mTagBFP2 used as negative controls. The ratio  
426 between OD600 and OD700 measurements was used to identify errors caused by red FP  
427 absorbance. Linear models fitted to the relationship between measured OD600 and OD700  
428 values confirmed that this relationship was very similar for all uninduced cells (Fig. 6B;  
429  $OD600 = 1.30 * OD700 - 0.02$ ), but mCherry induction resulted in a measurable deviation  
430 ( $OD600 = 1.37 * OD700 - 0.03$ , Fig. 6B-C). Looking at the relationship between this shift and  
431 cellular protein copy number (Fig. 6D), our results indicated that the OD600 error for  
432 mCherry was only apparent when mCherry levels per cell were high (over 100,000 per cell),  
433 and that the magnitude of this error was only about 5 %. In contrast, mGFPmut3 expression  
434 had no effect on cell density estimation using OD600, as expected. Surprisingly, we  
435 observed the opposite trend for mTagBFP2, in which OD600 measurement appeared to  
436 underestimate cell density where mTagBFP2 was expressed at high levels per cell. The  
437 reasons for this are currently unclear and beyond the scope of this paper, but our results  
438 suggest that this could be an interesting avenue for future work. Generally, this experiment  
439 confirmed that the presence of low to moderate FP levels per cell (under 100,000) do not  
440 perturb cell density estimates, and errors are of a lower magnitude in all cases than those  
441 from cellular fluorescence quenching.

442

## 443 **Discussion**

444

445 Our aim for this work was to develop a generalisable method that allows fluorescence  
446 readings on microplate readers to be calibrated to molecular units of fluorescent protein.

447 The method ought to be (1) accurate and sensitive, (2) as simple as possible, (3) suitable for  
448 any fluorescent protein, and (4) easily analysed. To develop the method, we adopted the  
449 principles of redundant experimental design, including the validation of multiple assay  
450 types, characterisation of the method's consistency, and the assessment of its generality for  
451 three different FPs (30).

452

453 Our initial method using a simple purification protocol (Fig. 2) and a commercial protein  
454 assay allowed us to develop an analysis pipeline to obtain conversion factors from purified  
455 FP calibrants. To demonstrate the accuracy and validity of our calibrations, we verified that  
456 the absorbance and fluorescence spectra of the calibrants matched their counterparts on  
457 FPbase (Fig. 1, Supplementary Fig. 2; (21,31)), and validated our initial protein assay  
458 measurements by cross comparison with two further methods. To do this, we adapted the  
459 low-throughput A280 assay into an accurate, high-throughput assay format, and showed  
460 that these were suitable for use with FPs even though some absorb in the near-UV range.  
461 This type of assay for FP quantification has not, to our knowledge, been demonstrated in  
462 the literature before, and we contend that it is likely to be of particular interest since it  
463 requires no calibrant or commercial reagent, no expensive quartz-based consumables and  
464 exhibits a sensitivity that exceeds that of commercial systems such as the Nanodrop.

465

466 We also discovered a novel methodological shortcut to obtaining FP concentrations using  
467 the extinction coefficients at their maximum excitation wavelength, the ECmax assay, which  
468 was both the simplest and the most robust of all the assays tested. Specifically, the ECmax  
469 assay was the least affected by buffer conditions, and had the largest linear range (to almost  
470 0.1 ng/ $\mu$ l; Fig. 3). We note that the assay is limited by the fact that it requires the used FP to

471 be documented on FPbase, and assumes that the documented ECmax measured by other  
472 laboratories is accurate. Promisingly, our results suggest good inter-lab agreement for these  
473 measurements (compare A280 and ECmax estimates, Fig. 3C). In addition, an analysis of all  
474 FPs on FPbase, comparing the proteins' extinction coefficients at 280 nm versus at their  
475 maximum excitation wavelength, supports the idea that the ECmax is a more sensitive assay  
476 for most FPs (Supplementary Fig. 16, Supplementary Table 4). While the EC(280) values are  
477 highly uniform (median: 27,400 M<sup>-1</sup>cm<sup>-1</sup>), likely because most FPs are very similar in size, the  
478 ECmax values are mostly considerably larger (median: 64,200 M<sup>-1</sup>cm<sup>-1</sup>). Impressively, as the  
479 ECmax assay specifically quantifies FP concentration rather than total protein concentration,  
480 we were also able to show that it is possible to do these calibrations in crude lysate without  
481 compromising on accuracy, demonstrating that calibrants may be produced without affinity  
482 purification (Fig. 3D-F). Overall, we expect calibrations carried out using the ECmax method,  
483 using either purified calibrants or (sonicated) cell lysates, to be equally accurate. We provide  
484 both rigorous and expedient protocols for prospective users on protocols.io.

485

486 While fluorescent proteins are biological molecules whose fluorescence activity is  
487 dependent on their condition of production and testing (such as pH and the availability of  
488 oxygen), the use of a few well-established techniques from standard bacterial protein  
489 overexpression protocols allows such problems to be avoided. For instance, the expression  
490 protocol we describe is designed to produce high levels of protein: we use high copy vectors  
491 and long expression times. However, we grow cells at low temperatures of 25-30 °C for the  
492 expression, which minimises the chance that overexpressed proteins will misfold or  
493 aggregate (32). The presence of aggregates can be checked by SDS-PAGE after the  
494 clarification step that separates the soluble and insoluble fraction (32). We rarely see

495 significant aggregation (Fig. 2C). Oxygen is also required for chromophore maturation (19),  
496 however shaken flask cultures will be well aerated, and the lysis and/or purification  
497 procedure gives time for any remaining immature proteins to mature during the protocol  
498 itself. (Simply exposing cells to air allows maturation of FPs expressed in anoxic conditions  
499 (33).) Furthermore, the buffer used for the calibration assays should match the cellular pH  
500 (we use pH 7.5). We also conduct calibration assays at a temperature that matches our  
501 bacterial assays (though we do not expect that minor temperature changes would have a  
502 significant effect on FP brightness or behaviour).

503

504 Current users of fluorescein calibrations may be interested in how this method compares  
505 with calibration using a serial dilution of fluorescein. The protocol for fluorescein calibration  
506 is certainly cheaper (£0.23 per calibration using details from (6)) owing to the fact that  
507 fluorescein is a low-cost fluorophore, and simpler, as the use of commercial calibrants  
508 obviates the need for calibrant preparation or concentration determination. The key  
509 advantage of FP calibration lies in its ability to be used to directly convert arbitrary units  
510 directly to molecules of one's desired FP, coupled with the freedom to produce bespoke  
511 calibrants from any desired FP, or indeed multiple FPs, from across the spectrum, whether  
512 or not they match the properties of fluorescein. While commercial FPs cost an average of  
513 £39.05 per calibration (assuming use of 10 µg FP per calibration, Supplementary Table 6),  
514 the estimated cost of producing one batch of FP calibrants in lysate is only £10.18, from  
515 which the standard yields are approximately 100 µg FP (using only a fraction of the culture).  
516 While FPs can display condition-dependent fluorescence, as discussed above, these effects  
517 can be minimised: indeed, they can be used to test the temperature or pH sensitivity of a  
518 user's FP under controlled conditions. Furthermore, fluorescein and other small molecules

519 also display condition-specific fluorescence, though this point is rarely considered (34).  
520 While it is difficult to directly compare the precision of this method with published data on  
521 fluorescein, the FPCountR protocol is clearly highly reproducible. Calculated conversion  
522 factors are typically within  $\pm 10\%$  of the expected value and coefficients of variation  
523 between independent replicates are typically below 0.1 (Supplementary Table 5). Following  
524 on from the exemplary work on fluorescein (6), there is clear potential for future inter-lab  
525 studies to extend our understanding about the accessibility and reproducibility of the  
526 FPCountR protocol.

527

528 Such calibrations can then be used, first, to enable the comparison of experimental results  
529 from different plate readers or across different settings, in molecules of fluorescent protein  
530 per particles of equivalent microspheres (MEFP/PEMS; Fig. 4B). This is akin to using  
531 fluorescein but with a broader application range, since using bespoke calibrants for each FP  
532 allows us to calibrate instruments for any FP regardless of its spectral characteristics. If used  
533 merely as comparative units, the precision (repeatability) of each calibration is important,  
534 but their accuracy (whether conversions predict molecule numbers as closely as possible) is  
535 not. Second, they can be used to express protein abundance as ‘molecules per cell’ (Fig. 5C).  
536 Accuracy here is an important consideration, and will not only depend on the accuracy of  
537 the FP calibration (discussed above), but also on the microsphere calibration, and the  
538 removal of any interactions between absorbance and fluorescence characteristics of cells  
539 expressing FPs. As to microsphere calibration, cross-comparison with flow cytometry data  
540 suggests cell count estimates from microsphere calibrations are reasonable (7,23), although  
541 Beal and colleagues used 0.961  $\mu\text{m}$  microspheres whose size is closer to *E. coli* than those  
542 used in this study (0.890  $\mu\text{m}$ ; the larger type are now unavailable). Our protein abundance

543 estimates ( $10^2$ - $10^5$  proteins per cell; Fig. 5B) are also within reasonable bounds (26,28),  
544 corroborating their use, and indicating that FP calibrations may enable protein abundance  
545 comparisons between microplate assays and proteomics experiments.

546

547 The consideration of whether the presence of cells interferes with fluorescence  
548 quantification (or vice versa) is multifaceted. It is well known that cells interfere with  
549 fluorescence measurements through autofluorescence. Cellular autofluorescence is known  
550 to largely impact GFP quantification accuracy (35), and is corrected for in FPCountR by  
551 normalising to the background fluorescence of control cells at a similar OD (akin to (7,15)).  
552 The 'quenching' of apparent FP fluorescence by the presence of cells is more rarely  
553 considered (14,15). We have found that the effect size is comparable for different FPs  
554 (Supplementary Fig. 14), unlike for autofluorescence, supporting previous observations by  
555 others (25). A correction for this attenuation in FPCountR compensates fluorescence  
556 according to the expected percentage quenched at the measured OD (Fig. 5B). Both of these  
557 corrections are included in the `process_plate()` function.

558

559 Certain sources of error cannot be adequately addressed by calibration alone. While some  
560 have noted that pH can affect the molecular brightness of certain FPs (15), this could not be  
561 compensated for analytically without user input detailing both the pH response profile of  
562 the included FPs and the pH of their cells. Fortunately, since the cellular pH in *E. coli* is  
563 limited between pH 7.2-7.8 (36), and even pH-sensitive FPs exhibit only mild (<10%)  
564 variation in molecular brightness for pH values between 7-8 (37,38), pH-dependent changes  
565 in molecular brightness are unlikely to have a large effect on quantifications.

566



567 The overall error in the accuracy of protein per cell quantifications using FP- and  
568 microsphere-calibrated microplate readers can be estimated as the sum of its components:  
569 20% (from protein quantification error, Fig. 3C, Supplementary Tables 1-2) and 33% (from  
570 cell count error deduced from flow cytometer counts, Fedorec et al., 2020), which results in  
571 approximately 50% error. This should be accurate enough to allow protein per cell  
572 quantification not just to the correct order of magnitude (ie. to estimate whether protein  
573 abundance is in the 100s/cell or 1000s/cell), but also suggests that quantifications are likely  
574 to be accurate to within two-fold of the true values. This should be more than adequate for  
575 most applications, including estimations of the relative magnitude of two or more FPs, as  
576 well as for genetic circuit modelling. Additional errors, such as those from cell quenching or  
577 from the comparison of OD600- vs OD700-quantified cell counts, can be avoided by the use  
578 of the FPCountR analytical R package. Others, such as those from pH-sensitive FPs, can be  
579 avoided by using pH-insensitive FPs.

580

581 Overall, it seems likely that the accuracy of calibrated molecule counts per cell may be  
582 limited by the accuracy of cell count calibration, since it is known that OD-specific cell  
583 counts change with growth rate, and that this is due to the positive relationship between  
584 growth rate and cell size for *E. coli* (24). We therefore expect these calculations of protein  
585 counts per cell will be more accurate where cell size and microsphere size are as similar as  
586 possible, and inaccuracies will arise if the differences become significant. Thus, these values  
587 are likely to be approximately accurate so long as the following assumptions are true: that *E.*  
588 *coli* absorbance (scatter) is well represented by microsphere properties, and that it doesn't  
589 change significantly over time or between samples. These will likely to be true for many *E.*  
590 *coli* experiments since cell shrinkage has been shown to take place only after several hours

591 in stationary culture, and only large growth rate differences maintained for prolonged  
592 periods were observed to make a significant difference to cell size in exponentially growing  
593 cells (24), but may fail if circuits impose significant burden on host cell resources that  
594 impacts growth rate or cell size (39–41). In contrast, using a conversion from OD to total cell  
595 volume in a given culture well allows us to remove the requirement for counting cells (Fig.  
596 5D) and allows the expression of protein concentrations as 0.01-100  $\mu\text{M}$ . These figures  
597 should be approximately accurate under the assumption that the OD-specific cell volume  
598 doesn't vary significantly between samples or over time. This is strongly supported by the  
599 results of Volkmer and colleagues (24) whose data suggests this variation is within 2-fold  
600 across a wide range of growth conditions, but also by others who have shown that as cell  
601 volumes increase, their OD-specific cell counts decrease by approximately the same  
602 magnitude (39,42). Units of concentration may also be more meaningful for reaction  
603 modelling since ultimately it is molecular concentration that is critical for binding and  
604 kinetics (9,43,44).

605

606 We used absolute protein quantification to investigate the problem first described by Hecht  
607 and colleagues (29) in which an association between mCherry overexpression and  
608 deviations in cell density measurements were made. Repeating these assays showed a clear  
609 effect, but this effect was of modest magnitude (<5%) and was only apparent at very high  
610 mCherry levels per cell (over  $10^5$  molecules per cell; Fig. 6). This suggests that for most  
611 circuits that use moderate expression levels to minimise cellular burden, OD600 values  
612 would remain an accurate way to quantify cell density. We also unexpectedly observed the  
613 opposite effect in mTagBFP2 expressions. As this analysis was technically a quantification of  
614 whether OD600 and OD700 measurements deviate from each other in the presence of

615 different FPs, these results might not suggest that OD600-based cell density readings in the  
616 presence of high mTagBFP2 are inaccurate. It might instead suggest that, conversely for  
617 mTagBFP2, the OD700 readings are inaccurate. We do not currently have an explanation for  
618 this finding. One possible contributing factor may be that while it is often described as one  
619 of the best blue FPs, mTagBFP2 has a higher propensity to aggregate than mCherry and  
620 most GFPs (45). Cell stress is known to induce *E. coli* to elongate (39,46), which may affect  
621 its scattering properties. It is possible that very high FP levels may frequently cause a small  
622 but significant error in cell density estimates due to combinations of effects from light  
623 absorption and scatter that warrants more study in order to allow us to further improve  
624 molecular quantifications of FPs under those conditions.

625

626 While flow cytometry and mass spectrometry allow us to probe single-cell measurements or  
627 the protein complement of an entire cell, respectively, microplate readers remain an  
628 important screening platform in the Design-Build-Test-Learn cycle due to ease of use, low  
629 cost and high iterative capabilities. This necessitates the development of methods for  
630 extracting informative numbers from such data. The ability to extract absolute protein  
631 abundance information from assays of engineered microbial cells is imperative to enable  
632 the characterisation, optimisation and tuning of genetic circuits in a rigorous and  
633 quantitative manner, and will allow for a deeper insight into how protein abundance affects  
634 genetic construct behaviour, cellular burden and growth rate. Importantly, our approach  
635 enables accurate, non-destructive, and easy protein abundance comparisons, even between  
636 samples that differ in growth rate or cell size.

637

638 Further, such absolute quantification need not be limited to fluorescent proteins. The last  
639 few years have seen a fantastic expansion of fluorogenic molecules, tools that have allowed  
640 the specific quantification of localised proteins (47–49), proteins in anaerobic environments  
641 (50,51), and the fluorescent quantification of RNAs (44,52,53). Calibration of these  
642 molecules would be more complex to achieve but no less valuable. Equally, calibration of  
643 alternative instruments such as flow cytometers are also of interest, but would require a  
644 very different approach, requiring calibrants to be attached to particles of cell-like sizes. We  
645 hope that our demonstration of how to achieve absolute FP quantifications from microplate  
646 reader assays using FPCountR can contribute to the effort to develop more quantitative  
647 approaches for the analysis of circuit behaviour in synthetic biology and beyond.

648

## 649 **Materials and Methods**

650

### 651 **Materials**

652 Primers and gblocks were obtained from IDT, and *E. coli* strain DH5-alpha (Invitrogen,  
653 18265-017) was used for molecular cloning. Chemicals and protein reagents were purchased  
654 from Merck, Sigma, ThermoFisher Scientific, and Bio-Rad, molecular biology reagents from  
655 NEB and Life Technologies and general laboratory reagents from Corning, Greiner Bio-One,  
656 Starlab and VWR.

657

### 658 **Fluorescent proteins**

659 The mCherry (54) protein sequence was based on the FPbase entry for mcherry (FPbase ID:  
660 ZERB6) with the following changes: M1(MVHHHHHHGSG). The mGFPmut3 (55) protein  
661 sequence was based on the FPbase entry for gfpmut3 (FPbase ID: A20WC) with the

662 following changes: M1(MVHHHHHHGSG), A206K (a substitution to make the protein  
663 monomeric; (18,19)). The mTagBFP2 (56) protein sequence was based on the FPbase entry  
664 for mtagbfp2 (FPbase ID: ZO7NN) with the following changes: M1(MVHHHHHHGSG). Full  
665 protein sequences are provided in Supplementary Table 9.

666

#### 667 **DNA assembly**

668 Vectors for fluorescent protein purification and growth curve assays were constructed  
669 according to standard protocols, via Golden Gate and Gibson assembly techniques using *E.*  
670 *coli* strain DH5 $\alpha$  (Invitrogen, 18265-017). Constructs were assembled into Standardised  
671 European Vector Architecture (SEVA) backbones (57): pS381 was generated from pS181  
672 with chloramphenicol substitution; pS361 was generated similarly from pS161. In an effort  
673 to approximately equalise expression levels between different proteins, the 5' untranslated  
674 region (including ribosome binding site) and 5' region of each construct was set to be  
675 identical up to residue 11 (coding region begins: *DNA*:

676 ATGGTTCACCATCATCATCACcacGGTtcgggc, *protein*: MVHHHHHHGSG). The second residue  
677 was set to valine to reduce the effects of N-end mediated degradation (58). The affinity tag  
678 chosen for purification was the His<sub>6</sub> tag, which was followed by a short unstructured linker  
679 (GSG). Full DNA sequences of vectors are provided in Supplementary Table 9. All three  
680 pS381 plasmids used in purifications are available from Addgene under the IDs 186733-  
681 186735.

682

#### 683 **FPCount (wet lab) protocol**

684 The FPCount protocol consists of calibrant preparation followed by a protein assay (for  
685 protein concentration) and a fluorescence assay (for protein activity). Each step is described

686 in the following sections below. In addition, we have provided step-by-step instructions for  
687 the recommended FPCount protocol in Supplementary Note 5. This protocol consists of the  
688 preparation of calibrants as fluorescent proteins in cell lysates prepared by sonication, and  
689 the use of the ECmax assay as the protein assay. This protocol is also available on  
690 protocols.io, at [https://www.protocols.io/view/fpcount-protocol-in-lysate-purification-free-](https://www.protocols.io/view/fpcount-protocol-in-lysate-purification-free-proto-bzudp6s6)  
691 [proto-bzudp6s6](https://www.protocols.io/view/fpcount-protocol-in-lysate-purification-free-proto-bzudp6s6) (59). We also detail two other calibration protocols on protocols.io: the full  
692 protocol conducted for Fig. 3, using FP purification and three protein assays for cross-  
693 validation, available at [https://www.protocols.io/view/fpcount-protocol-full-protocol-](https://www.protocols.io/view/fpcount-protocol-full-protocol-bztsp6ne)  
694 [bztsp6ne](https://www.protocols.io/view/fpcount-protocol-full-protocol-bztsp6ne) (60), and a shorter protocol requiring purification but using the ECmax assay only,  
695 available at <https://www.protocols.io/view/fpcount-protocol-short-protocol-bzt6p6re> (61).

696

#### 697 **Protein expression and harvesting**

698 Fluorescent proteins were produced using pS381 (SEVA) expression vectors in *E. coli*  
699 BL21(DE3) strains. Glycerol stocks were inoculated into 50 ml Luria Broth (Miller)  
700 supplemented with 50 µg/ml chloramphenicol and 0.02 % arabinose and were grown  
701 overnight at 30 °C at 250 rpm. Cells were harvested after ~16 h by transferring them to  
702 prechilled containers on ice. All further steps were conducted on ice. OD600 readings were  
703 taken, and 40 OD of cells was transferred to fresh falcon tubes, washed once in T50N300 (50  
704 mM Tris-HCl pH 7.5, 300 mM NaCl) and resuspended in lysis buffer (T50N300, 1X protease  
705 inhibitors (EDTA-free, Pierce A32955), filter sterilised, supplemented with lysozyme 100  
706 µg/ml). Cells were separated into 20 OD (2 ml) fractions and sonicated (QSonica Q125  
707 sonicator, 50% amplitude, 10s on, 10s off, 2 min). Lysates were supplemented with 5 mM  
708 CaCl<sub>2</sub>, 50 mM MgCl<sub>2</sub> and treated with DNase I (50 U/ml, bovine pancreas, MP Biomedicals,  
709 219006210) for 30 min at 4 °C. Soluble fractions were isolated by isolation of the

710 supernatant after centrifugation (16,000 xg, 30 min, 4 °C), and both fractions were checked  
711 by SDS-PAGE followed by staining with Coomassie-based dye according to the  
712 manufacturer's instructions (Instant Blue Protein Stain, Sigma ISB1L-1L).

713

#### 714 **Protein purification**

715 Fluorescent proteins were purified in batch using His-tag affinity chromatography at room  
716 temperature according to the resin manufacturer's instructions (Thermo Fisher). Lysates  
717 were supplemented with 10 mM imidazole and 600 µl was applied to HisPur Cobalt resin  
718 (300 µl, ThermoFisher) equilibrated in Binding Buffer (T50N300+pi, 10 mM imidazole),  
719 mixed and incubated at room temperature for ~15 min before removal (1,000 xg, 1 min).  
720 This was repeated four times, before the resin was washed with 10 column volumes of  
721 Binding Buffer. Protein was eluted in Elution Buffer (T50N300+pi, 150 mM imidazole). All  
722 protein fractions for calibration were stored protected from light at 4 °C.

723

#### 724 **Preparation for calibration assays**

725 Elution fractions were combined and concentrated approximately 10-fold using Amicon  
726 centrifugal filter columns (Merck, UFC5010), followed by buffer exchange (1000x) into  
727 T5N15 (5mM Tris-HCl pH 7.5, 15 mM NaCl) or T5N15+pi (T5N15, 1x protease inhibitors, filter  
728 sterilised).

729

730 **Microplate reader assays.** All assays were carried out using a Tecan Spark microplate reader  
731 except the fluorescence spectra assays, which were carried out using a BMG Clariostar Plus  
732 microplate reader.

733

734 **Calibration assays.** For each FP calibration, both concentration and fluorescence assays  
735 were carried out on the same dilution series of protein. Concentrated, buffer exchanged FP  
736 (100  $\mu$ l) was diluted in 900  $\mu$ l buffer, then diluted 1:2 into 500  $\mu$ l buffer in 1.5 ml  
737 eppendorfs. A total of 11 dilutions were prepared in this way, distributed into UV-  
738 transparent microplates (Greiner, 655801) as duplicates (225  $\mu$ l). Bovine serum albumin  
739 (BSA) standards (from Micro BCA Protein Assay kit, ThermoFisher, 23235) were prepared in  
740 parallel with the same buffer(s). This dilution set was then subjected to the protein  
741 concentration and fluorescence assays.

742

743 **Protein concentration assays: A280 assay and ECmax assay**

744 Absorbance assays were carried out on 225  $\mu$ l protein in UV-transparent plates, using the  
745 Spark absorbance scan method (see Supplementary Methods).

746

747 **Fluorescence assays**

748 Following absorbance scans, 200  $\mu$ l from each well of the original plate was transferred into  
749 clear polystyrene plates (Corning, 3370). This plate was sealed (Eppendorf Masterclear real-  
750 time PCR film adhesive, 30132947) and used to run the Spark fluorescence methods (see  
751 Supplementary Methods) on all relevant instruments, channels and gains.

752

753 **Protein concentration assays: microBCA assay**

754 BCA assays were carried out using the Micro BCA Protein Assay kit (ThermoFisher, 23235)  
755 according to the manufacturer's instructions (microplate protocol). Briefly, 150  $\mu$ l of  
756 working reagent was dispensed into a clean microplate, and 150  $\mu$ l from each well of the  
757 fluorescence assay plate was mixed into the reagent with a multichannel pipettor. Reactions



758 were covered with a plate seal (BreatheEasy sealing membrane, Sigma, Z380059), and  
759 subjected to the Spark microBCA method (see Supplementary Methods).

760

### 761 **Fluorescein calibration**

762 Fluorescein (Thermo Fisher R14782, 1 mM in DMSO) was diluted to a 100  $\mu$ M stock solution  
763 in 100 mM NaOH (the appropriate buffer for fluorescein). This stock (100  $\mu$ l) was diluted in  
764 900  $\mu$ l buffer, then diluted 1:2 into 500  $\mu$ l buffer in 1.5 ml eppendorfs. A total of 11 dilutions  
765 were prepared in this way, distributed into clear polystyrene plates (Corning, 3370) as  
766 duplicates (200  $\mu$ l). This plate was sealed (Eppendorf Masterclear real-time PCR film  
767 adhesive, 30132947) and used to run the Spark fluorescence methods (see Supplementary  
768 Methods) on the appropriate filter set (ex: 485/20, em: 535/35) on a Tecan Spark plate  
769 reader. Data was processed using FPCountR-type functions with or without normalisation  
770 for relative brightness.

771

### 772 **Relative brightness normalisation**

773 To compare conversion factors from different FPs or small molecules, we calculated the  
774 relative brightness of each molecule to be compared. This calculation attempts to normalise  
775 for the fluorescence characteristics that differ between calibrants, namely (i) their  
776 brightness, and (ii) how well their excitation and emission spectra overlap with the relevant  
777 instrument filter sets. The efficiency of excitation in the excitation filter (480nm with 20nm  
778 bandwidth) in exciting the fluorophore was taken as *ex.  $eff_{480/20} = \sum_{i=470}^{490} A_{\lambda=i}$*  where  
779 absorbance ( $A$ ) values for that at every wavelength ( $\lambda$ ) in the excitation filter's bandwidth  
780 (in 1nm steps) were summed, using normalised absorbance spectra where the maximal  
781 absorbance is set to 1. The efficiency of the emission filter (325nm with 35nm bandwidth) in

782 detecting fluorescence from the fluorophore was defined as:  $em. eff_{535/25} = \frac{\sum_{i=522.5}^{547.5} em_{\lambda=i}}{\sum em_{\lambda=i}}$ ,

783 where the sum of the emitted fluorescence at the relevant wavelengths was taken and

784 normalised to the sum of the total fluorescence over the entire emission spectrum. Again,

785 spectra used were normalised spectra where the maximal values had been set to 1. Finally,

786 relative brightness was taken as:  $relative\ brightness = EC * ex. eff_{480/20} * QY *$

787  $em. eff_{535/25}$  where  $EC$  is the extinction coefficient ( $M^{-1}cm^{-1}$ ) and  $QY$  is the quantum yield.

788 Conversion factors ( $CF$ , in RFU/molecule) were converted to normalised conversion factors

789 ( $CF_{norm}$ ) as:  $CF_{norm} = CF * \frac{relative\ brightness_{mGFPmut3}}{relative\ brightness_{calibrant}}$ .

790

### 791 **Calibration of OD600 and OD700 values using microspheres**

792 Calibration of optical density readings used to quantify cell number (OD600 and OD700) was

793 carried out according to published protocols (7). The microspheres used were monodisperse

794 silica microspheres (Cospheric, SiO<sub>2</sub>MS-2.0, 2.0g/cc, d<sub>50</sub>=0.890um, CV=3.2%, <1% Doubles).

795

### 796 **Bacterial timecourse assays**

797 DH10B *E. coli* transformants were grown overnight in M9 medium (M9 salts (1X, Sigma

798 M6030), casamino acids (0.2%), fructose (0.8%), thiamine HCl (0.25 mg/ml), MgSO<sub>4</sub> (2 mM),

799 CaCl<sub>2</sub> (0.1 mM)) supplemented with 50 µg/ml chloramphenicol, in a deep-well plate (30 °C,

800 700 rpm), and diluted the following morning into fresh M9 with antibiotic (deep-well plate,

801 30 °C, 700 rpm) to an OD600 ( $cm^{-1}$ ) of 0.05. After 1 hour, cultures were transferred into

802 clear 96-well microplates (Corning, 3370) with pre-loaded arabinose (5 µl). Plates were

803 sealed (BreatheEasy sealing membrane, Sigma, Z380059) and grown in a Tecan Spark plate

804 reader in kinetic mode (see Supplementary Methods, Spark growth curve method).

805

## 806 **Analytical methods**

807 All data was analysed using R (62). The FPCountR package that was developed for the FP

808 calibrations is available on GitHub at <https://github.com/ec363/fpcountr> (63).

809 Supplementary Note 6 includes a description of the analytical steps of the key functions. For

810 a summary of the functions, see Fig. 1 and Supplementary Fig. 15.

811

## 812 **Fluorescence scans**

813 Excitation and emission spectra of the fluorescent proteins were conducted using a BMG

814 Clariostar Plus microplate reader in sealed plates (Corning, 3370; Eppendorf Masterclear

815 real-time PCR film adhesive, 30132947) at wavelengths appropriate to each FP (see

816 Supplementary Methods).

817

## 818 **Figures**

819 Figures were created using RStudio and Biorender.com.

820

## 821 **Data availability statement**

822 This study includes no data deposited in external repositories. Key datasets are provided in

823 the Supplementary Tables. Remaining datasets are available from the authors on

824 reasonable request.

825

## 826 **Code availability statement**

827 Computer code produced in this study is available on GitHub

828 (<https://github.com/ec363/fpcountr>).

829

### 830 **Availability of materials**

831 Plasmids generated for FP purification are available on Addgene. Other plasmids generated  
832 in this paper are available from the authors on request.

833

### 834 **Acknowledgements**

835 GBS and EC acknowledge funding from the Royal Academy of Engineering (RAEng CiET  
836 1819\5).

837

### 838 **Author contributions**

839 EC and GBS conceived the study. EC conducted the experiments, analysed the data and  
840 wrote the R package. EC and GBS wrote the manuscript.

841

### 842 **Conflict of Interest**

843 The authors declare no conflict of interest.

844

### 845 **References**

- 846 1. Delvigne F, Zacchetti B, Fickers P, Fifani B, Roulling F, Lefebvre C, et al. Improving control  
847 in microbial cell factories: from single cell to large-scale bioproduction. *FEMS Microbiol*  
848 *Lett* [Internet]. 2018 Sep 24 [cited 2021 Nov 26]; Available from:  
849 [https://academic.oup.com/femsle/advance-](https://academic.oup.com/femsle/advance-article/doi/10.1093/femsle/fny236/5106341)  
850 [article/doi/10.1093/femsle/fny236/5106341](https://academic.oup.com/femsle/advance-article/doi/10.1093/femsle/fny236/5106341)
- 851 2. Beal J, Goñi-Moreno A, Myers C, Hecht A, Vicente M del C, Parco M, et al. The long  
852 journey towards standards for engineering biosystems: Are the Molecular Biology and  
853 the Biotech communities ready to standardise? *EMBO Rep* [Internet]. 2020 May 6  
854 [cited 2021 Nov 26];21(5). Available from:  
855 <https://onlinelibrary.wiley.com/doi/10.15252/embr.202050521>
- 856 3. Perrino G, Hadjimitsis A, Ledesma-Amaro R, Stan GB. Control engineering and synthetic  
857 biology: working in synergy for the analysis and control of microbial systems. *Curr Opin*

- 858 Microbiol [Internet]. 2021 Aug 1 [cited 2021 Jun 3];62:68–75. Available from:  
859 <https://www.sciencedirect.com/science/article/pii/S1369527421000655>
- 860 4. Chalfie M, Tu Y, Euskirchen G, Ward WW, Prasher DC. Green fluorescent protein as a  
861 marker for gene expression. *Science* [Internet]. 1994 Feb 11 [cited 2021 Jan  
862 18];263(5148):802–5. Available from:  
863 <https://science.sciencemag.org/content/263/5148/802>
- 864 5. Rodriguez EA, Campbell RE, Lin JY, Lin MZ, Miyawaki A, Palmer AE, et al. The Growing  
865 and Glowing Toolbox of Fluorescent and Photoactive Proteins. *Trends Biochem Sci*.  
866 2017 Feb;42(2):111–29.
- 867 6. Beal J, Haddock-Angelli T, Baldwin G, Gershater M, Dwijayanti A, Storch M, et al.  
868 Quantification of bacterial fluorescence using independent calibrants. *PLOS ONE*  
869 [Internet]. 2018 Jun 21 [cited 2020 Jun 29];13(6):e0199432. Available from:  
870 <https://journals.plos.org/plosone/article?id=10.1371/journal.pone.0199432>
- 871 7. Fedorec AJH, Robinson CM, Wen KY, Barnes CP. FlopR: An Open Source Software  
872 Package for Calibration and Normalization of Plate Reader and Flow Cytometry Data.  
873 *ACS Synth Biol* [Internet]. 2020 Sep 18 [cited 2021 Nov 26];9(9):2258–66. Available  
874 from: <https://pubs.acs.org/doi/10.1021/acssynbio.0c00296>
- 875 8. Gorochofski TE, Chelysheva I, Eriksen M, Nair P, Pedersen S, Ignatova Z. Absolute  
876 quantification of translational regulation and burden using combined sequencing  
877 approaches. *Mol Syst Biol*. 2019 03;15(5):e8719.
- 878 9. Boada Y, Vignoni A, Alarcon-Ruiz I, Andreu-Villarraig C, Monfort-Llorens R, Requena A, et  
879 al. Characterization of Gene Circuit Parts Based on Multiobjective Optimization by  
880 Using Standard Calibrated Measurements. *ChemBioChem* [Internet]. 2019 Oct 15  
881 [cited 2021 Nov 26];20(20):2653–65. Available from:  
882 <https://onlinelibrary.wiley.com/doi/10.1002/cbic.201900272>
- 883 10. Vignoni A, Boada Y, Boada Acosta L, Andreu-Villarraig C, Alarcón I, Requena A, et al.  
884 Fluorescence calibration and color equivalence for quantitative synthetic biology. *IFAC-*  
885 *Pap* [Internet]. 2019 [cited 2021 Nov 26];52(26):129–34. Available from:  
886 <https://linkinghub.elsevier.com/retrieve/pii/S2405896319321305>
- 887 11. Taniguchi Y, Choi PJ, Li GW, Chen H, Babu M, Hearn J, et al. Quantifying *E. coli* Proteome  
888 and Transcriptome with Single-Molecule Sensitivity in Single Cells. 2010;329:8.
- 889 12. Finan K, Raulf A, Heilemann M. A Set of Homo-Oligomeric Standards Allows Accurate  
890 Protein Counting. *Angew Chem Int Ed* [Internet]. 2015 Oct 5 [cited 2021 Nov  
891 26];54(41):12049–52. Available from:  
892 <https://onlinelibrary.wiley.com/doi/10.1002/anie.201505664>
- 893 13. Tie HC, Madugula V, Lu L. The development of a single molecule fluorescence standard  
894 and its application in estimating the stoichiometry of the nuclear pore complex.  
895 *Biochem Biophys Res Commun* [Internet]. 2016 Sep [cited 2021 Nov 26];478(4):1694–  
896 9. Available from: <https://linkinghub.elsevier.com/retrieve/pii/S0006291X16314486>

- 897 14. Canton B, Labno A, Endy D. Refinement and standardization of synthetic biological parts  
898 and devices. *Nat Biotechnol* [Internet]. 2008 Jul [cited 2022 Jan 3];26(7):787–93.  
899 Available from: <https://www.nature.com/articles/nbt1413>
- 900 15. Hirst CD, Ainsworth C, Baldwin G, Kitney RI, Freemont PS. Protocol for the  
901 Standardisation of Transcriptional Measurements. In: McGenity TJ, Timmis KN, Nogales  
902 B, editors. *Hydrocarbon and Lipid Microbiology Protocols* [Internet]. Berlin, Heidelberg:  
903 Springer Berlin Heidelberg; 2015 [cited 2021 Nov 26]. p. 9–26. (Springer Protocols  
904 Handbooks). Available from: [http://link.springer.com/10.1007/8623\\_2015\\_148](http://link.springer.com/10.1007/8623_2015_148)
- 905 16. Noble JE, Knight AE, Reason AJ, Di Matola A, Bailey MJA. A Comparison of Protein  
906 Quantitation Assays for Biopharmaceutical Applications. *Mol Biotechnol* [Internet].  
907 2007 Sep 13 [cited 2021 Nov 26];37(2):99–111. Available from:  
908 <http://link.springer.com/10.1007/s12033-007-0038-9>
- 909 17. Pace CN, Vajdos F, Fee L, Grimsley G, Gray T. How to measure and predict the molar  
910 absorption coefficient of a protein. *Protein Sci* [Internet]. 1995 Nov [cited 2021 Nov  
911 26];4(11):2411–23. Available from:  
912 <https://onlinelibrary.wiley.com/doi/10.1002/pro.5560041120>
- 913 18. Zacharias DA, Violin JD, Newton AC, Tsien RY. Partitioning of Lipid-Modified Monomeric  
914 GFPs into Membrane Microdomains of Live Cells. *Science* [Internet]. 2002 May 3 [cited  
915 2021 Nov 26];296(5569):913–6. Available from:  
916 <https://www.science.org/doi/10.1126/science.1068539>
- 917 19. Shaner NC, Steinbach PA, Tsien RY. A guide to choosing fluorescent proteins. *Nat*  
918 *Methods* [Internet]. 2005 Dec [cited 2021 Nov 26];2(12):905–9. Available from:  
919 <https://www.nature.com/articles/nmeth819>
- 920 20. Thermo Fisher Scientific. NanoDrop 1000 Spectrophotometer, V3.8 User’s Manual  
921 [Internet]. 2010 [cited 2021 Nov 26]. Available from:  
922 [https://tools.thermofisher.com/content/sfs/manuals/nd-1000-v3.8-users-manual-](https://tools.thermofisher.com/content/sfs/manuals/nd-1000-v3.8-users-manual-8%205x11.pdf)  
923 [8%205x11.pdf](https://tools.thermofisher.com/content/sfs/manuals/nd-1000-v3.8-users-manual-8%205x11.pdf)
- 924 21. Lambert TJ. FPbase: a community-editable fluorescent protein database. *Nat Methods*  
925 [Internet]. 2019 Apr [cited 2021 Nov 26];16(4):277–8. Available from:  
926 <http://www.nature.com/articles/s41592-019-0352-8>
- 927 22. Stevenson K, McVey AF, Clark IBN, Swain PS, Pilizota T. General calibration of microbial  
928 growth in microplate readers. *Sci Rep* [Internet]. 2016 Dec [cited 2021 Nov  
929 26];6(1):38828. Available from: <http://www.nature.com/articles/srep38828>
- 930 23. Beal J, Farny NG, Haddock-Angelli T, Selvarajah V, Baldwin GS, Buckley-Taylor R, et al.  
931 Robust estimation of bacterial cell count from optical density. *Commun Biol* [Internet].  
932 2020 Dec [cited 2021 Nov 26];3(1):512. Available from:  
933 <https://www.nature.com/articles/s42003-020-01127-5>
- 934 24. Volkmer B, Heinemann M. Condition-Dependent Cell Volume and Concentration of  
935 *Escherichia coli* to Facilitate Data Conversion for Systems Biology Modeling. Langowski

- 936 J, editor. PLoS ONE [Internet]. 2011 Jul 29 [cited 2021 Nov 26];6(7):e23126. Available  
937 from: <https://dx.plos.org/10.1371/journal.pone.0023126>
- 938 25. Zhang C, Liu MS, Han B, Xing XH. Correcting for the inner filter effect in measurements  
939 of fluorescent proteins in high-cell-density cultures. *Anal Biochem*. 2009 Jul  
940 15;390(2):197–202.
- 941 26. Ishihama Y, Schmidt T, Rappsilber J, Mann M, Hartl FU, Kerner MJ, et al. Protein  
942 abundance profiling of the Escherichia coli cytosol. *BMC Genomics* [Internet]. 2008  
943 [cited 2021 Nov 26];9(1):102. Available from:  
944 <http://bmcbgenomics.biomedcentral.com/articles/10.1186/1471-2164-9-102>
- 945 27. Arike L, Valgepea K, Peil L, Nahku R, Adamberg K, Vilu R. Comparison and applications of  
946 label-free absolute proteome quantification methods on Escherichia coli. *J Proteomics*  
947 [Internet]. 2012 Sep [cited 2021 Nov 26];75(17):5437–48. Available from:  
948 <https://linkinghub.elsevier.com/retrieve/pii/S1874391912004861>
- 949 28. Li GW, Burkhardt D, Gross C, Weissman JS. Quantifying Absolute Protein Synthesis Rates  
950 Reveals Principles Underlying Allocation of Cellular Resources. *Cell* [Internet]. 2014 Apr  
951 [cited 2021 Nov 26];157(3):624–35. Available from:  
952 <https://linkinghub.elsevier.com/retrieve/pii/S0092867414002323>
- 953 29. Hecht A, Endy D, Salit M, Munson MS. When Wavelengths Collide: Bias in Cell  
954 Abundance Measurements Due to Expressed Fluorescent Proteins. *ACS Synth Biol*  
955 [Internet]. 2016 Sep 16 [cited 2019 Dec 10];5(9):1024–7. Available from:  
956 <https://doi.org/10.1021/acssynbio.6b00072>
- 957 30. Casadevall A, Fang FC. Rigorous Science: a How-To Guide. *mBio* [Internet]. 2016 Dec 30  
958 [cited 2021 Nov 3];7(6). Available from:  
959 <https://journals.asm.org/doi/10.1128/mBio.01902-16>
- 960 31. Raynal B, Lenormand P, Baron B, Hoos S, England P. Quality assessment and  
961 optimization of purified protein samples: why and how? *Microb Cell Factories*  
962 [Internet]. 2014 Dec [cited 2021 Nov 26];13(1):180. Available from:  
963 <http://microbialcellfactories.biomedcentral.com/articles/10.1186/s12934-014-0180-6>
- 964 32. Green MR, Sambrook J. *Molecular cloning: a laboratory manual*. 4th ed. Cold Spring  
965 Harbor, N.Y: Cold Spring Harbor Laboratory Press; 2012.
- 966 33. Zhang C, Xing XH, Lou K. Rapid detection of a gfp-marked Enterobacter aerogenes under  
967 anaerobic conditions by aerobic fluorescence recovery. *FEMS Microbiol Lett* [Internet].  
968 2005 Aug 1 [cited 2022 Jun 6];249(2):211–8. Available from:  
969 <https://doi.org/10.1016/j.femsle.2005.05.051>
- 970 34. Le Guern F, Mussard V, Gaucher A, Rottman M, Prim D. Fluorescein Derivatives as  
971 Fluorescent Probes for pH Monitoring along Recent Biological Applications. *Int J Mol*  
972 *Sci*. 2020 Dec 3;21(23):E9217.



- 973 35. Lichten CA, White R, Clark IB, Swain PS. Unmixing of fluorescence spectra to resolve  
974 quantitative time-series measurements of gene expression in plate readers. BMC  
975 Biotechnol [Internet]. 2014 Dec [cited 2021 Nov 26];14(1):11. Available from:  
976 <https://bmcbiotechnol.biomedcentral.com/articles/10.1186/1472-6750-14-11>
- 977 36. Wilks JC, Slonczewski JL. pH of the Cytoplasm and Periplasm of *Escherichia coli* : Rapid  
978 Measurement by Green Fluorescent Protein Fluorimetry. J Bacteriol [Internet]. 2007  
979 Aug [cited 2021 Nov 26];189(15):5601–7. Available from:  
980 <https://journals.asm.org/doi/10.1128/JB.00615-07>
- 981 37. Kneen M, Farinas J, Li Y, Verkman AS. Green Fluorescent Protein as a Noninvasive  
982 Intracellular pH Indicator. Biophys J [Internet]. 1998 Mar [cited 2021 Nov  
983 26];74(3):1591–9. Available from:  
984 <https://linkinghub.elsevier.com/retrieve/pii/S0006349598778701>
- 985 38. Roberts TM, Rudolf F, Meyer A, Pellaux R, Whitehead E, Panke S, et al. Identification and  
986 Characterisation of a pH-stable GFP. Sci Rep [Internet]. 2016 Jun 21 [cited 2021 Nov  
987 26];6(1):28166. Available from: <https://www.nature.com/articles/srep28166>
- 988 39. Basan M, Zhu M, Dai X, Warren M, Sévin D, Wang Y, et al. Inflating bacterial cells by  
989 increased protein synthesis. Mol Syst Biol [Internet]. 2015 Oct [cited 2021 Nov  
990 26];11(10):836. Available from:  
991 <https://onlinelibrary.wiley.com/doi/10.15252/msb.20156178>
- 992 40. Ceroni F, Algar R, Stan GB, Ellis T. Quantifying cellular capacity identifies gene expression  
993 designs with reduced burden. Nat Methods [Internet]. 2015 May [cited 2019 Mar  
994 14];12(5):415–8. Available from: <http://www.nature.com/articles/nmeth.3339>
- 995 41. Boo A, Ellis T, Stan GB. Host-aware synthetic biology. Curr Opin Syst Biol [Internet]. 2019  
996 Apr [cited 2020 Jun 26];14:66–72. Available from:  
997 <https://linkinghub.elsevier.com/retrieve/pii/S245231001930006X>
- 998 42. Schaechter M, Maaløe O, Kjeldgaard NOY 1958. Dependency on Medium and  
999 Temperature of Cell Size and Chemical Composition during Balanced Growth of  
1000 *Salmonella typhimurium*. Microbiology [Internet]. 1958 [cited 2021 Nov 26];19(3):592–  
1001 606. Available from:  
1002 [https://www.microbiologyresearch.org/content/journal/micro/10.1099/00221287-19-  
1003 3-592](https://www.microbiologyresearch.org/content/journal/micro/10.1099/00221287-19-3-592)
- 1004 43. Bloom RJ, Winkler SM, Smolke CD. A quantitative framework for the forward design of  
1005 synthetic miRNA circuits. Nat Methods [Internet]. 2014 Nov [cited 2021 Nov  
1006 26];11(11):1147–53. Available from: <http://www.nature.com/articles/nmeth.3100>
- 1007 44. Siegal-Gaskins D, Tuza ZA, Kim J, Noireaux V, Murray RM. Gene Circuit Performance  
1008 Characterization and Resource Usage in a Cell-Free “Breadboard”. ACS Synth Biol  
1009 [Internet]. 2014 Jun 20 [cited 2021 Nov 26];3(6):416–25. Available from:  
1010 <https://pubs.acs.org/doi/10.1021/sb400203p>



- 1011 45. Cranfill PJ, Sell BR, Baird MA, Allen JR, Lavagnino Z, de Gruiter HM, et al. Quantitative  
1012 assessment of fluorescent proteins. *Nat Methods* [Internet]. 2016 Jul [cited 2020 Jul  
1013 3];13(7):557–62. Available from: <http://www.nature.com/articles/nmeth.3891>
- 1014 46. Justice SS, Hunstad DA, Cegelski L, Hultgren SJ. Morphological plasticity as a bacterial  
1015 survival strategy. *Nat Rev Microbiol* [Internet]. 2008 Feb [cited 2021 Nov 26];6(2):162–  
1016 8. Available from: <http://www.nature.com/articles/nrmicro1820>
- 1017 47. Svendsen S, Zimprich C, McDougall MG, Klaubert DH, Los GV. Spatial separation and  
1018 bidirectional trafficking of proteins using a multi-functional reporter. *BMC Cell Biol*  
1019 [Internet]. 2008 Dec [cited 2021 Nov 26];9(1):17. Available from:  
1020 <https://bmcmolcellbiol.biomedcentral.com/articles/10.1186/1471-2121-9-17>
- 1021 48. Li C, Mourton A, Plamont MA, Rodrigues V, Aujard I, Volovitch M, et al. Fluorogenic  
1022 Probing of Membrane Protein Trafficking. *Bioconjug Chem* [Internet]. 2018 Jun 20  
1023 [cited 2019 Mar 20];29(6):1823–8. Available from:  
1024 <http://pubs.acs.org/doi/10.1021/acs.bioconjchem.8b00180>
- 1025 49. Csibra E, Renders M, Pinheiro V. Bacterial cell display as a robust and versatile platform  
1026 for the engineering of low affinity ligands and enzymes. *ChemBioChem* [Internet]. 2020  
1027 May 15 [cited 2020 May 26];cbic.202000203. Available from:  
1028 <https://onlinelibrary.wiley.com/doi/abs/10.1002/cbic.202000203>
- 1029 50. Streett HE, Kalis KM, Papoutsakis ET. A Strongly Fluorescing Anaerobic Reporter and  
1030 Protein-Tagging System for *Clostridium* Organisms Based on the Fluorescence-  
1031 Activating and Absorption-Shifting Tag Protein (FAST). Kivisaar M, editor. *Appl Environ*  
1032 *Microbiol* [Internet]. 2019 Jul 15 [cited 2021 Nov 26];85(14). Available from:  
1033 <https://journals.asm.org/doi/10.1128/AEM.00622-19>
- 1034 51. Charubin K, Streett H, Papoutsakis ET. Development of Strong Anaerobic Fluorescent  
1035 Reporters for *Clostridium acetobutylicum* and *Clostridium ljungdahlii* Using HaloTag  
1036 and SNAP-tag Proteins. Kelly RM, editor. *Appl Environ Microbiol* [Internet]. 2020 Oct  
1037 [cited 2021 Nov 26];86(20). Available from:  
1038 <https://journals.asm.org/doi/10.1128/AEM.01271-20>
- 1039 52. Pothoulakis G, Ceroni F, Reeve B, Ellis T. The Spinach RNA Aptamer as a Characterization  
1040 Tool for Synthetic Biology. *ACS Synth Biol* [Internet]. 2014 Mar 21 [cited 2021 Nov  
1041 26];3(3):182–7. Available from: <https://pubs.acs.org/doi/10.1021/sb400089c>
- 1042 53. Yerramilli VS, Kim KH. Labeling RNAs in Live Cells Using Malachite Green Aptamer  
1043 Scaffolds as Fluorescent Probes. *ACS Synth Biol* [Internet]. 2018 Mar 16 [cited 2021  
1044 Nov 26];7(3):758–66. Available from:  
1045 <https://pubs.acs.org/doi/10.1021/acssynbio.7b00237>
- 1046 54. Shaner NC, Campbell RE, Steinbach PA, Giepmans BNG, Palmer AE, Tsien RY. Improved  
1047 monomeric red, orange and yellow fluorescent proteins derived from *Discosoma* sp.  
1048 red fluorescent protein. *Nat Biotechnol* [Internet]. 2004 Dec [cited 2020 May  
1049 22];22(12):1567–72. Available from: <https://www.nature.com/articles/nbt1037>

- 1050 55. Cormack BP, Valdivia RH, Falkow S. FACS-optimized mutants of the green fluorescent  
1051 protein (GFP). *Gene* [Internet]. 1996 Jan [cited 2019 Oct 23];173(1):33–8. Available  
1052 from: <https://linkinghub.elsevier.com/retrieve/pii/0378111995006850>
- 1053 56. Subach OM, Cranfill PJ, Davidson MW, Verkhusha VV. An Enhanced Monomeric Blue  
1054 Fluorescent Protein with the High Chemical Stability of the Chromophore. *PLOS ONE*  
1055 [Internet]. 2011 Dec 8 [cited 2021 Jan 13];6(12):e28674. Available from:  
1056 <https://journals.plos.org/plosone/article?id=10.1371/journal.pone.0028674>
- 1057 57. Silva-Rocha R, Martínez-García E, Calles B, Chavarría M, Arce-Rodríguez A, de las Heras  
1058 A, et al. The Standard European Vector Architecture (SEVA): a coherent platform for  
1059 the analysis and deployment of complex prokaryotic phenotypes. *Nucleic Acids Res*  
1060 [Internet]. 2013 Jan [cited 2021 Nov 26];41(Database issue):D666–75. Available from:  
1061 <https://www.ncbi.nlm.nih.gov/pmc/articles/PMC3531073/>
- 1062 58. Mogk A, Schmidt R, Bukau B. The N-end rule pathway for regulated proteolysis:  
1063 prokaryotic and eukaryotic strategies. *Trends Cell Biol* [Internet]. 2007 Apr 1 [cited  
1064 2021 Nov 26];17(4):165–72. Available from: [https://www.cell.com/trends/cell-  
1065 biology/abstract/S0962-8924\(07\)00028-1](https://www.cell.com/trends/cell-biology/abstract/S0962-8924(07)00028-1)
- 1066 59. Csibra E, Stan GB. FPCount protocol - in-lysate (purification free) protocol. *protocols.io*  
1067 [Internet]. 2021 [cited 2021 Dec 5]; Available from:  
1068 <https://www.protocols.io/view/fpcount-protocol-in-lysate-purification-free-protobzudp6s6>  
1069
- 1070 60. Csibra E, Stan GB. FPCount protocol - Full protocol. *protocols.io* [Internet]. 2021 [cited  
1071 2021 Dec 5]; Available from: [https://www.protocols.io/view/fpcount-protocol-full-  
1072 protocol-bztsp6ne](https://www.protocols.io/view/fpcount-protocol-full-protocol-bztsp6ne)
- 1073 61. Csibra E, Stan GB. FPCount protocol - Short protocol. *protocols.io* [Internet]. 2021 [cited  
1074 2021 Dec 5]; Available from: [https://www.protocols.io/view/fpcount-protocol-short-  
1075 protocol-bzt6p6re](https://www.protocols.io/view/fpcount-protocol-short-protocol-bzt6p6re)
- 1076 62. R Core Team. R: The R Project for Statistical Computing [Internet]. 2021 [cited 2021 Dec  
1077 5]. Available from: <https://www.r-project.org/>
- 1078 63. Csibra E. FPCountR: Fluorescent protein calibration for plate readers [Internet]. Zenodo;  
1079 2021 [cited 2021 Dec 5]. Available from: <https://zenodo.org/record/5760028>
- 1080

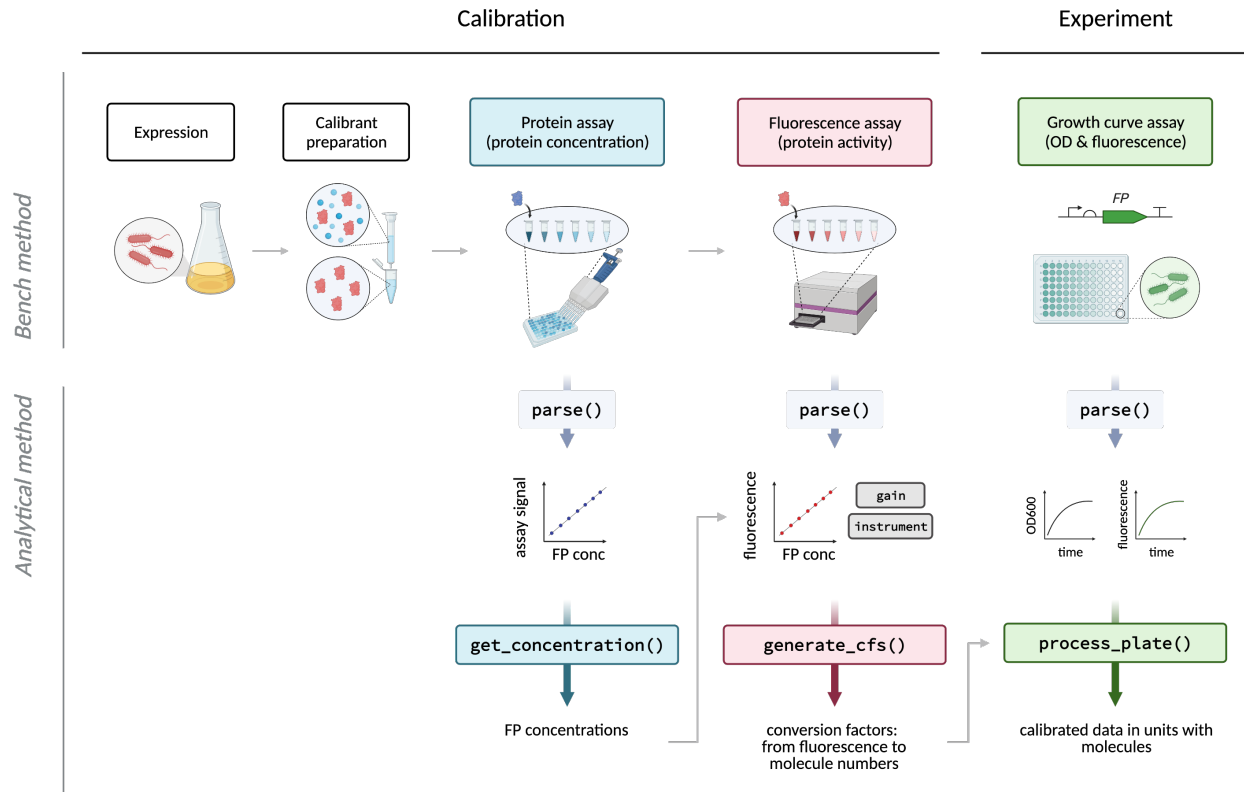

**Figure 1. Overview of fluorescent protein calibration workflow using FPCountR.** A calibration workflow is described (*left*), followed by a demonstration of how this calibration can be used to convert experimental data from arbitrary fluorescence units per optical density into molecules per cell (*right*). The calibration workflow consists of a wet lab protocol (*top*, available on protocols.io) and an analysis package (*bottom*, available on GitHub). In brief, the protocol describes how to prepare fluorescent protein calibrants by expression and purification, though the latter step is optional as lysates allow accurate calibration without the need for purification. The protocol also describes how to collect data for the calibration for both the protein assay to determine protein concentration, as well as the fluorescence assay to determine protein activity. The analytical workflow is provided as an open source R package, complete with functions that enable the extraction of protein concentrations from protein assay data, conversion factors (arbitrary fluorescence units per molecule) from a combination of protein and fluorescence assay data, and functions that allow users to convert experimental data into absolute units.

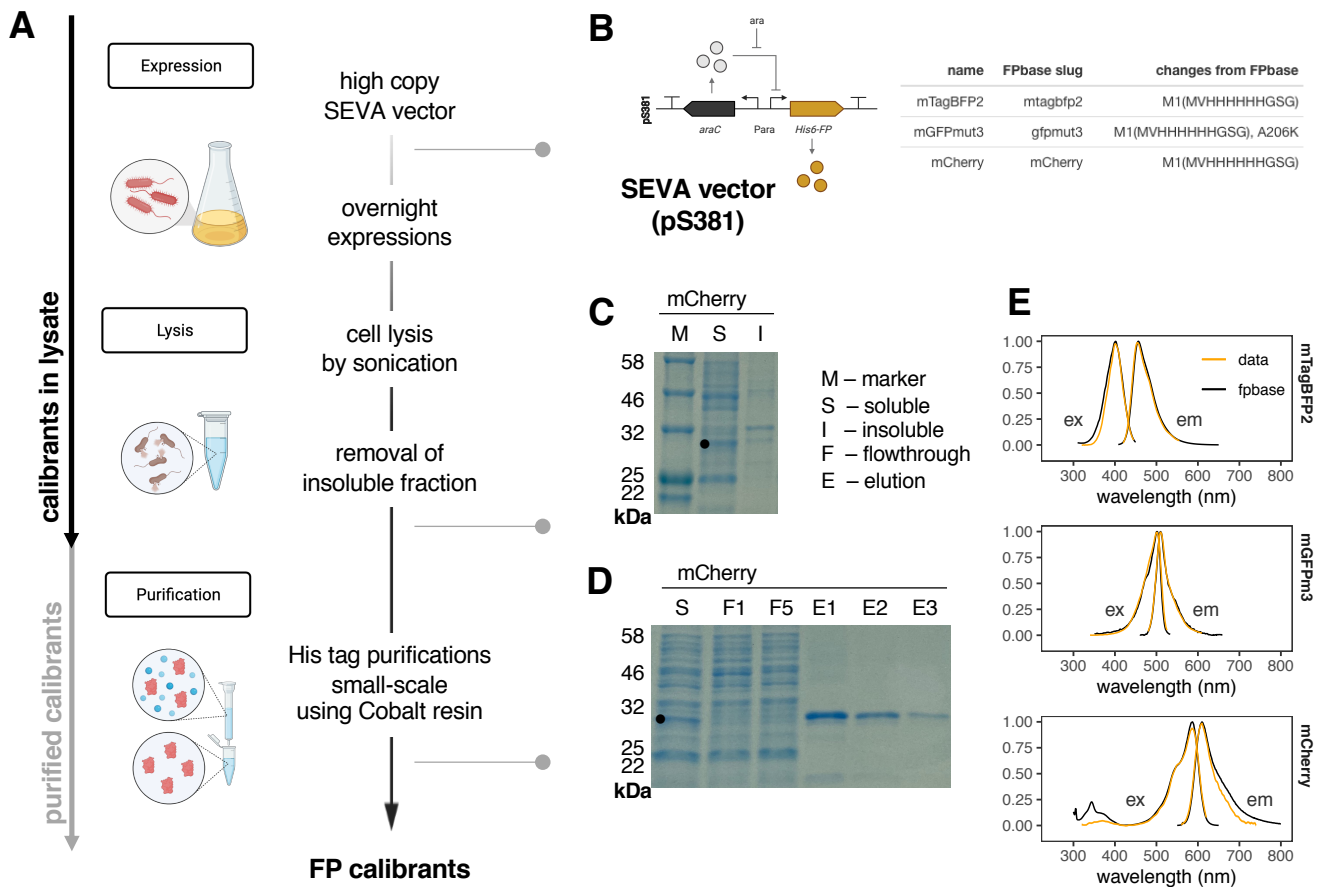

## Figure 2. Preparation of fluorescent protein calibrants.

**A. Protocol summary.** The use of high-copy vectors and overnight expression was designed to maximise protein production. Cells were lysed using sonication, to avoid the requirement to add chemical components that may interfere with downstream processes. Insoluble proteins were removed via centrifugation. Proteins were purified using His-tag affinity purification with cobalt resin which was expected to co-isolate fewer impurities. The arrows on the left represent the steps required to prepare purified calibrants (grey) vs. calibrants in lysate (black). **B. Vector and FP design.** A standardised FP expression vector was constructed from an arabinose-inducible His-tagged FP construct in a high-copy SEVA vector. Three commonly-used FPs from across the spectral range were chosen for testing this protocol: mTagBFP2, mGFPmut3, and mCherry. A table of the three proteins illustrates any changes in protein sequence compared to their FPbase counterparts, showing identical matches with the exception of affinity tags and a monomerising mutation for GFPmut3. **C. Expression and solubility verification.** SDS-PAGE analysis of lysates after separation of the insoluble fraction was used to make sure that most of the fluorescent protein was soluble. The displayed SDS-PAGE is from an mCherry purification, showing the separation of the soluble (S) vs. insoluble (I) fraction, next to the protein marker (M) on a 12 % gel. **D. Purification verification.** SDS-PAGE analysis after purification was used to confirm the success of purifications. The displayed SDS-PAGE is from an mCherry purification, showing the separation of the soluble (S) fraction, next to two flowthrough (F) fractions from the binding steps showing efficient FP binding to the cobalt resin, and three elution (E) fractions. **E. Fluorescence spectra.** Fluorescence spectral scans (ex, excitation; em, emission) were used to confirm that the purified FP behaves as expected. The figure shows obtained spectra (normalised such that the highest value = 1) fitted to a loess model with a 95% confidence interval (orange) overlaid with FPbase spectra (black) for each FP. Displayed spectra represent one sample measured in duplicate, that is representative of at least 2 independently purified batches of calibrant.

## A Comparison of calibration protocols

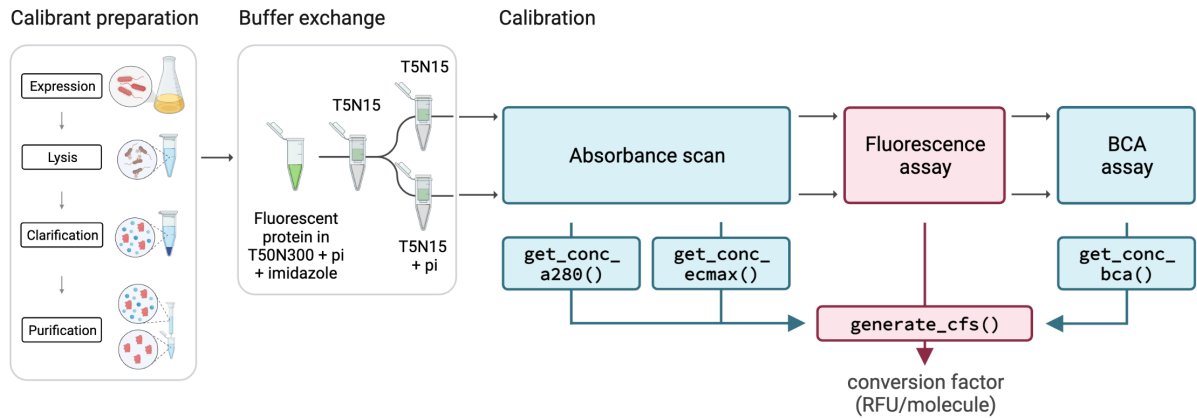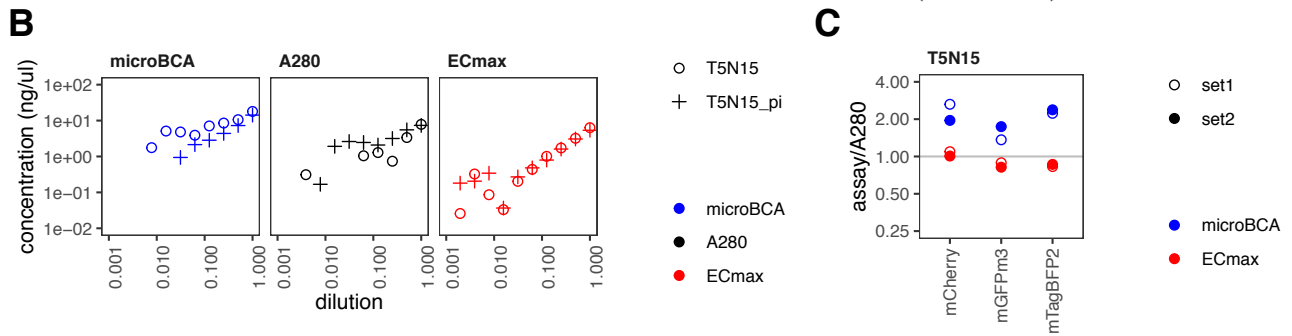

## D Calibration in lysate

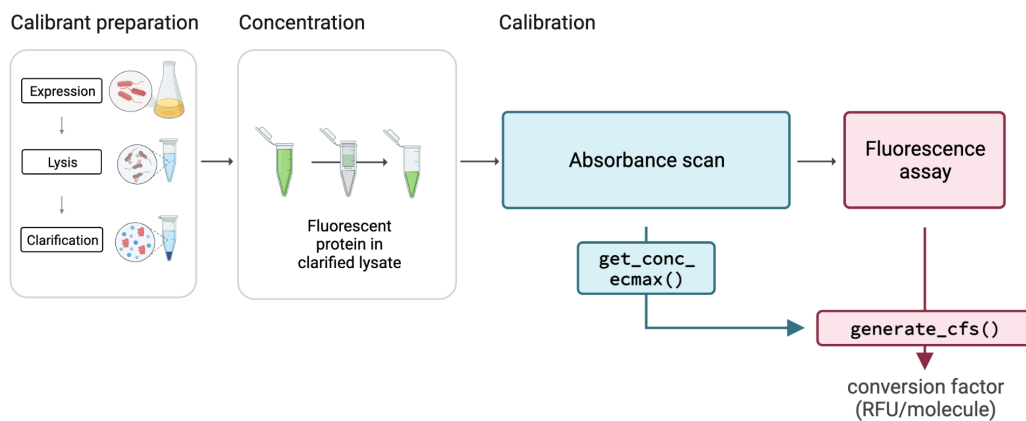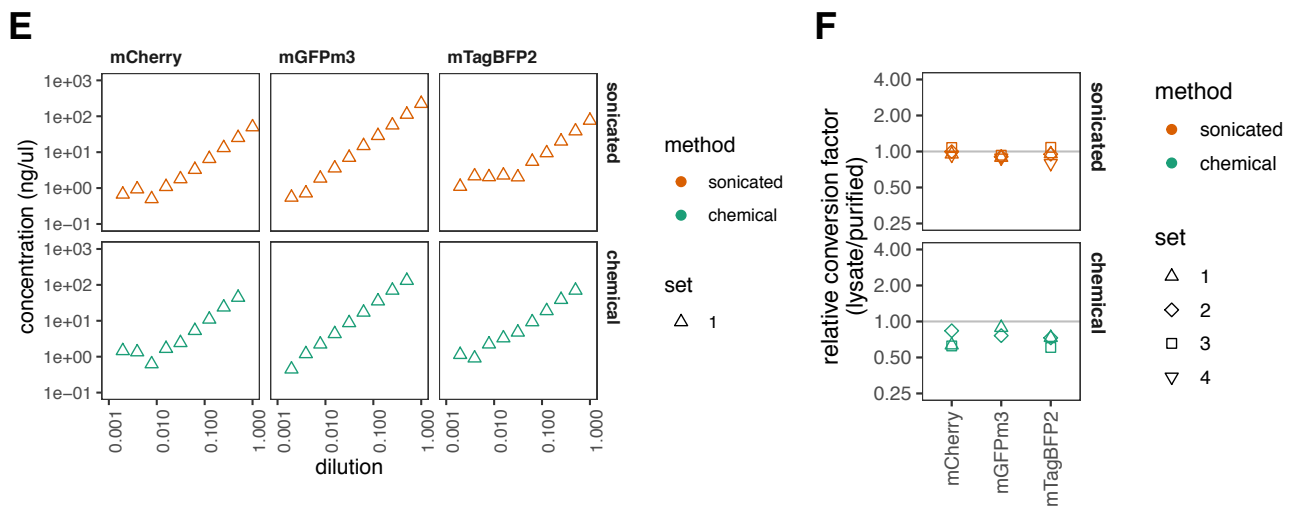

**Figure 3. Systematic characterisation of calibration protocols reveals novel assay that allows calibration in crude lysates.**

**A-C. Characterisation of calibration methods using purified proteins. A. Sample preparation and assay workflow.** Purified FPs in elution buffer (T50N300 with protease inhibitors (pi) and imidazole) were dialysed (1) into T5N15 and then again (2) into T5N15 or T5N15 with pi. Serial dilutions of each of these FPs in both buffers were then prepared, and each dilution was subjected to three protein assays (microBCA, A280 and ECmax assay) as well as the fluorescence assay. **B. Effect of buffer and assay on measured protein concentration of each dilution.** An example of how the buffer and choice of assay effect the measured protein concentrations using a dilution series of mTagBFP2 protein (for full results see Supplementary Fig. 9). The serial dilution was a 2-fold dilution, where 11 dilutions were prepared and measured in duplicate. Points represent the mean of the duplicate values. All dilutions were measured with the A280 and ECmax assays but only the top 8 dilutions were tested with the microBCA assay. The values for the A280 and ECmax assays were normalised for scatter as indicated in Supplementary Table 2. Any missing data points had concentrations recorded as being below 0.01 ng/ $\mu$ l. **C. Effect of assay on calculated protein concentration compared to the A280.** The raw data of each serial dilution, as displayed in B, was fitted to a linear model and used to estimate the concentration of the first sample in the series (where the dilution factor = 1), according to methods for each assay as set out in Supplementary Fig. 2, 7 and 8. For a given FP batch (set), the microBCA and ECmax assay error was calculated by taking the fold difference in concentration predicted by the named assay, versus that predicted by the A280 assay using T5N15 buffer. Each point therefore represents one value for each FP batch. The full data for this figure can be found in Supplementary Table 1.

**D-F. FP calibration in crude lysates. D. Sample preparation and assay workflow.** Calibration in lysate requires fewer steps: affinity purification is omitted, buffer exchange is not required (optionally, lysates may be concentrated to increase signal), and dilution series are subject to only two assays requiring no commercial reagents or incubation steps. **E. Measured protein concentrations of FPs in lysate with ECmax assay.** Dilution series using lysates obtained by sonication (orange) or chemical lysis using the commercial B-PER reagent (Thermo Fisher, green), were measured with an absorbance scan and `get_conc_ecmax()`. Data plotted as in B. The top dilution of each series using chemical lysis was removed due to excessive sample scatter. The full data set can be found in Supplementary Fig. 11A. **F. Difference between conversion factors using lysate vs purified protein.** Conversion factors were compared by calculating the fold difference (lysate/purified protein) at each gain. Plots display mean fold differences across the gains and error bars represent the standard deviations. The full data set can be found in Supplementary Fig. 11B.



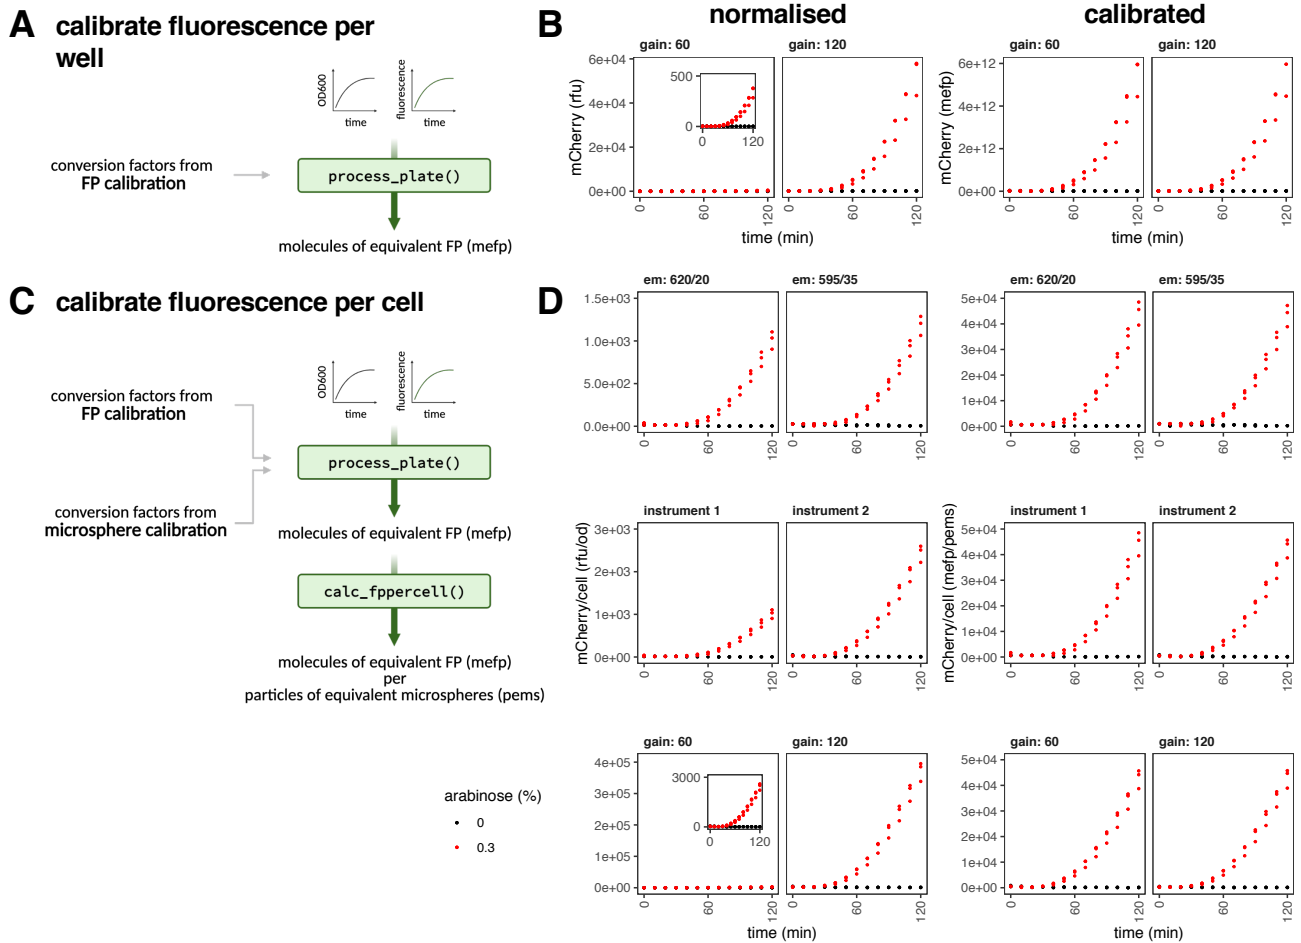

**Figure 4. FP calibration allows comparison across gains and instruments for FPs other than GFP.**

**A. Calibration of fluorescence per well in units of MEFP.** Timecourse experimental data of *E. coli* protein expression may be processed using the `process_plate()` function using conversion factors obtained from FP calibration. This allows the conversion of normalised data (in relative fluorescence units, rfu) to be converted into calibrated units, of ‘molecules of equivalent fluorescent protein’ or ‘MEFP’. **B. Comparison of normalised vs calibrated data in MEFP.** Starter cultures of *E. coli* DH10B containing pS381\_ara\_mCherry were transferred into a 96-well plate. mCherry expression was uninduced (grey) or induced 0.1% (black) arabinose at 0 minutes. Absorbance at OD700 and fluorescence was monitored every ten minutes. Data was collected from three biological replicates, each of which is plotted. *Left panel:* normalised mCherry in units of RFU. *Right panel:* calibrated mCherry in units of MEFP. Inset plot shows the same data as the parent plot on a zoomed axis. **C. Calibration of fluorescence per cell in units of MEFP/PEMS.** By combining the FP conversion factors with conversion factors from a microsphere calibration the data can be further processed using the `calc_fppercell()` function into ‘per cell’ data with units of MEFP per ‘particles of equivalent microspheres’ (PEMS). **D. Comparison of normalised vs calibrated data in MEFP/PEMS.** Expressions were carried out as in B. Normalised and calibrated values are shown when compared across different filter sets (*top*, notation: emission wavelength/bandwidth), instruments (*middle*) and gains (*bottom*). Data for the filter and gain comparisons were taken using the same instrument.



**A**

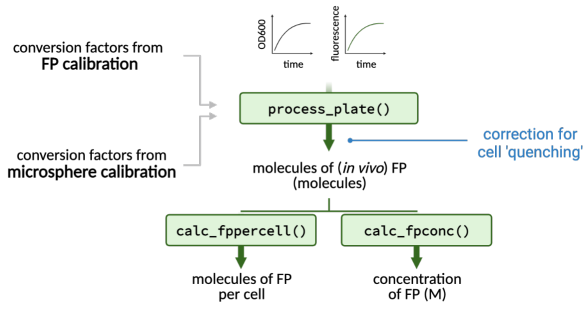

**B**

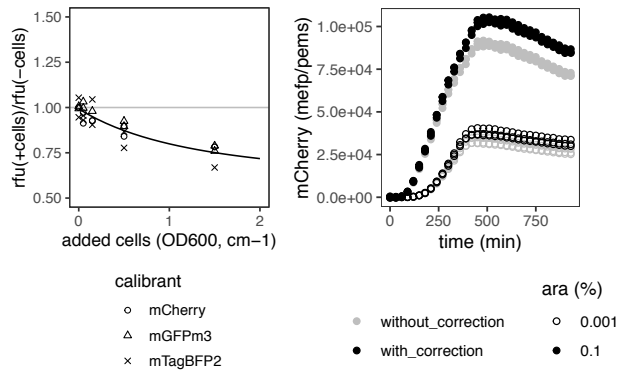

**C**

*OD-specific cell concentration*  
(eg. from microsphere calibration)

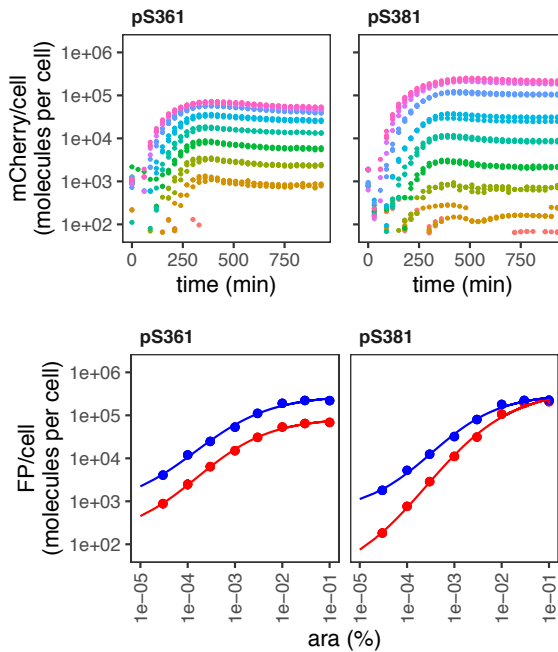

**D**

*OD-specific cell volume*  
(eg. from Volkmer 2011 data)

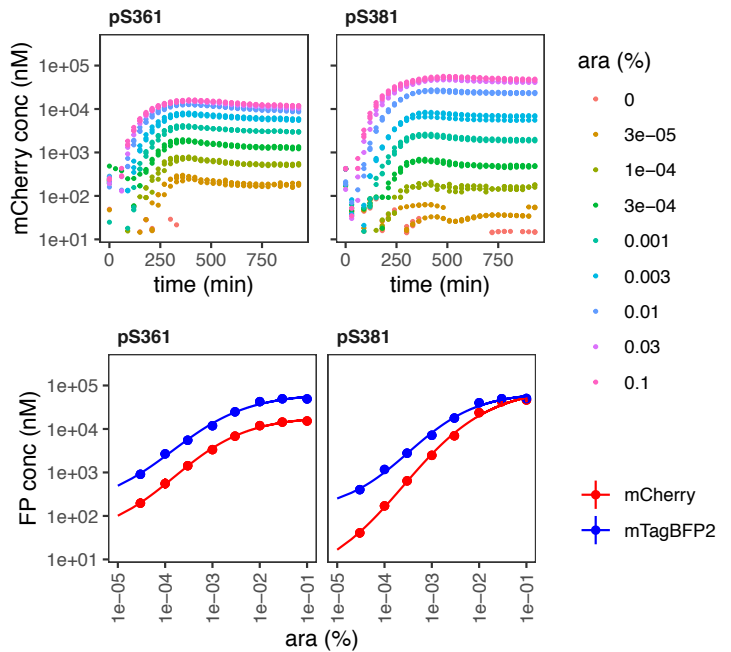

**Figure 5. Absolute quantification of *E. coli* timeseries data in molecules per cell.**

**A. Functions to convert experimental data to absolute units.** Diagram of modifications to the `process_plate()` function to (i) incorporate a compensation step based on a quantitative understanding of the impact of cell density on apparent fluorescence (this allows the units to be recorded as molecules per cell), and (ii) to calculate molecular concentration of each FP instead, in molar units. **B. Quantification of the quenching effect on fluorescence on three FPs.** Purified FPs were mixed with non-fluorescent *E. coli* at a range of concentrations, and OD600 and fluorescence intensity were recorded. After normalising for cellular autofluorescence, the fold differences between relative fluorescence intensity (rfu) with (+) and without (-) added cells was quantified (*left*). Data was collected in duplicates, with both points plotted. A model was fit through this data to enable prediction of expected fluorescence quenching for a given cell density on experimental data. An example of the effect of the correction (*right panel*). An mCherry expression vector induced with low (open circles) and high (closed circles) concentration arabinose is presented without (grey) and with (black) correction. Data was collected from three biological replicates and all points are plotted. **C-D. Absolute protein quantification in molecules per cell (C) and molar concentration (D).** mCherry expression (*top*) from medium (pS361, p15A) and high (pS381, colE1) copy vectors was induced at a range of arabinose concentrations and quantified in a timecourse assay in a calibrated plate reader. Data was processed as described in (A) and cell estimates based on microsphere calibrations were used to calculate per cell values (C), or OD-specific cell volume data from Volkmer et al., 2011 was used to calculate molar concentrations (D). Data was collected from three biological replicates, each of which is plotted. (*Bottom*) mCherry expression from the top panel is compared with mTagBFP2 expression from an identical assay, plotted against arabinose concentration at 420 min post induction. Displayed points show the mean values from two independent experiments, each of which tested three biological replicates. Error bars indicate standard deviations.

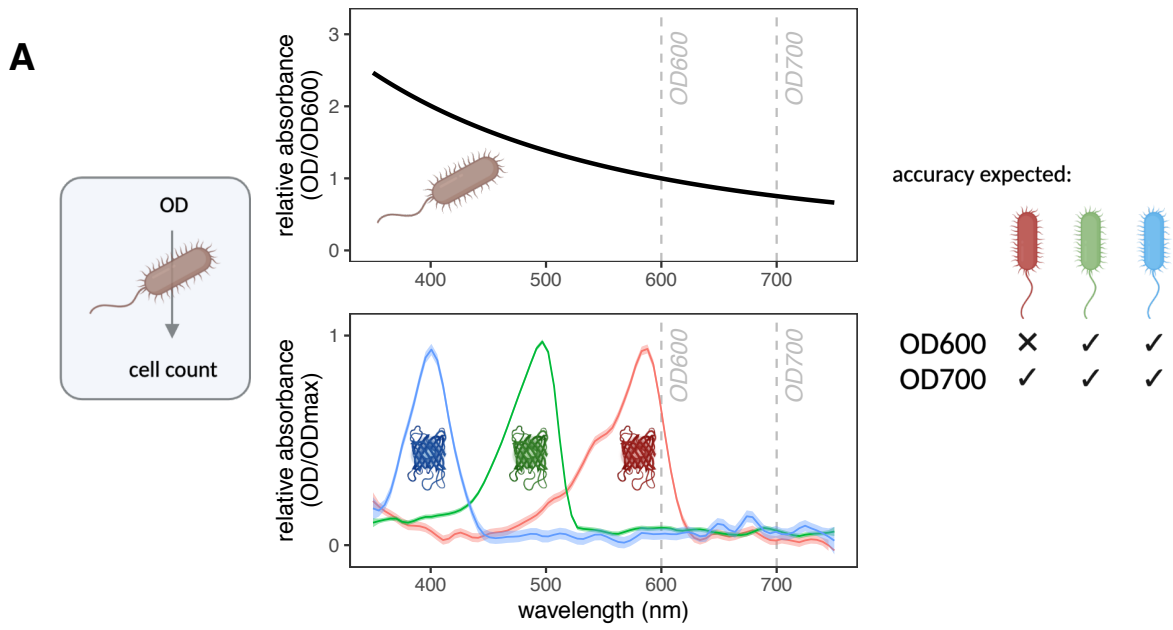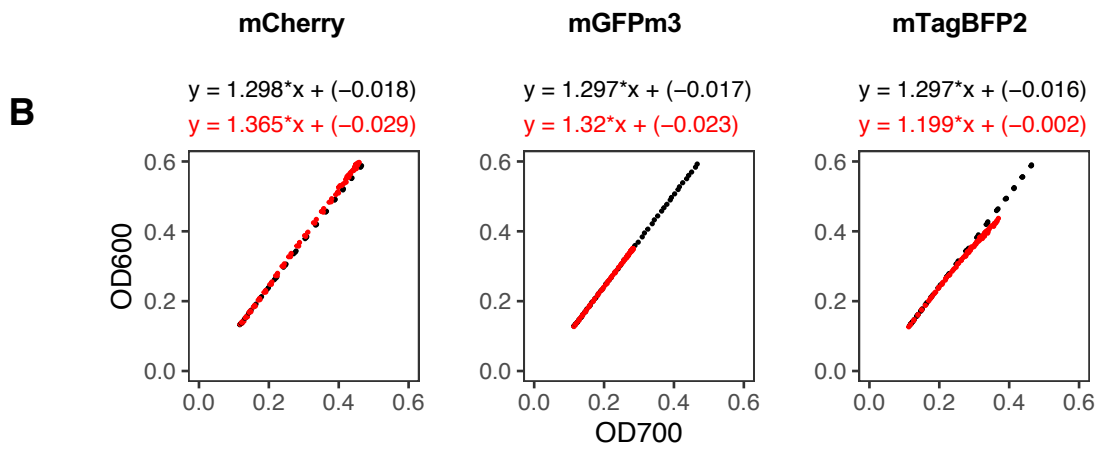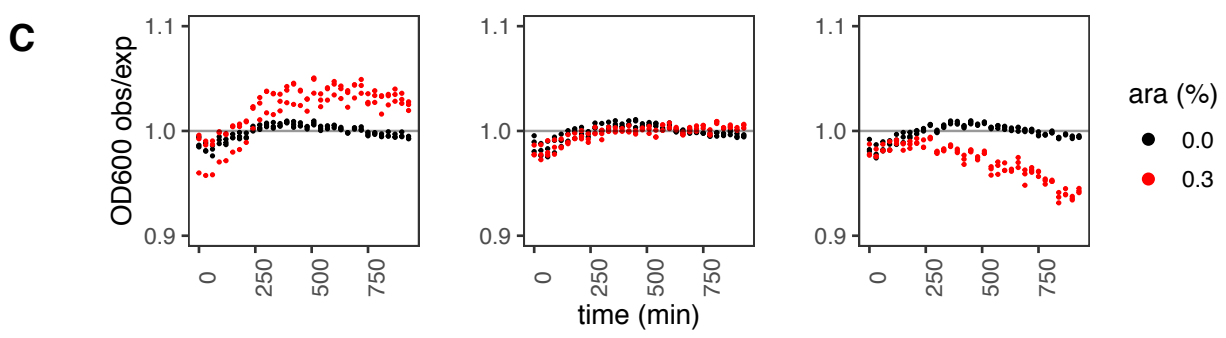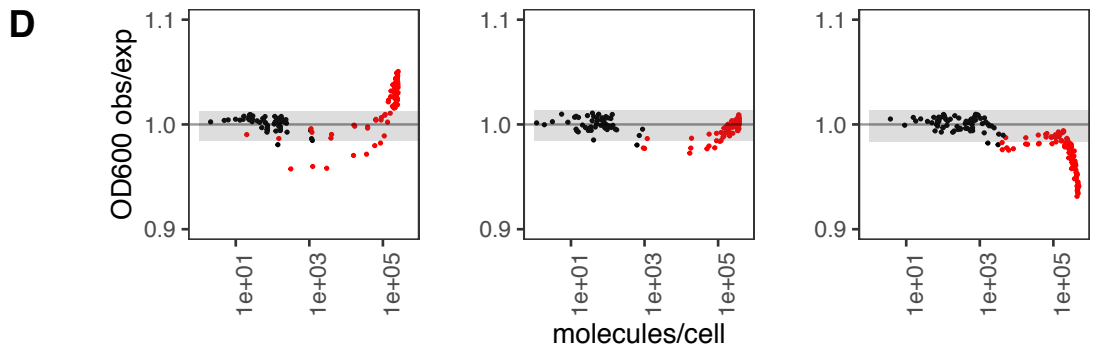

**Figure 6. Evaluation of OD600:OD700 ratios in cell growth assays.**

**A. Cell count accuracy with FPs.** In bacterial assays, cell counts are obtained from calibrated OD600 or OD700 measurements on the assumption that the only contributor to absorbance at 600 or 700nm are cells. Cellular OD600:OD700 ratios (*top plot*, data from Supplementary Fig. 11) approximate 1.3. Red FPs like mCherry absorb light at wavelengths used for cell density assessments (*bottom plot*, data from Supplementary Fig. 1B) and may lead to an error in cell count estimates. **B-D. Timecourse expression assays of three FPs** from the pS381 vector were monitored for OD600, OD700 and fluorescence intensity every 30 minutes, without (black) and with (red) arabinose. Data was collected from three biological replicates, and all points are plotted. This is a representative experiment of at least two independent experiments for each FP. Note OD600:OD700 ratios once again approximate 1.3. **B. Relationship between OD700 and OD600 values.** Linear models were fitted to data from three FPs, and shown above each plot. **C. OD600 error plotted against time.** OD600 error was obtained by dividing observed values by expected values. Expected values were calculated from the OD700 values and the measured OD600~OD700 relationship of the 0% arabinose sample (see B). **D. Effect of FP abundance on OD600 error.** The OD600 error was plotted against abundance of each FP in molecules/cell. Grey shading indicates the mean of the samples without arabinose  $\pm 2$ \*standard deviations.
